# Supplementary material for: Palbociclib Induces the Apoptosis of Lung Squamous Cell Carcinoma Cells via RB-Independent STAT3 Phosphorylation
Source: MDPI journal article supplement (doi:10.3390/curroncol29080462), 2022-08-18
Supplement: s1 [file s1]

Figure 2A H520

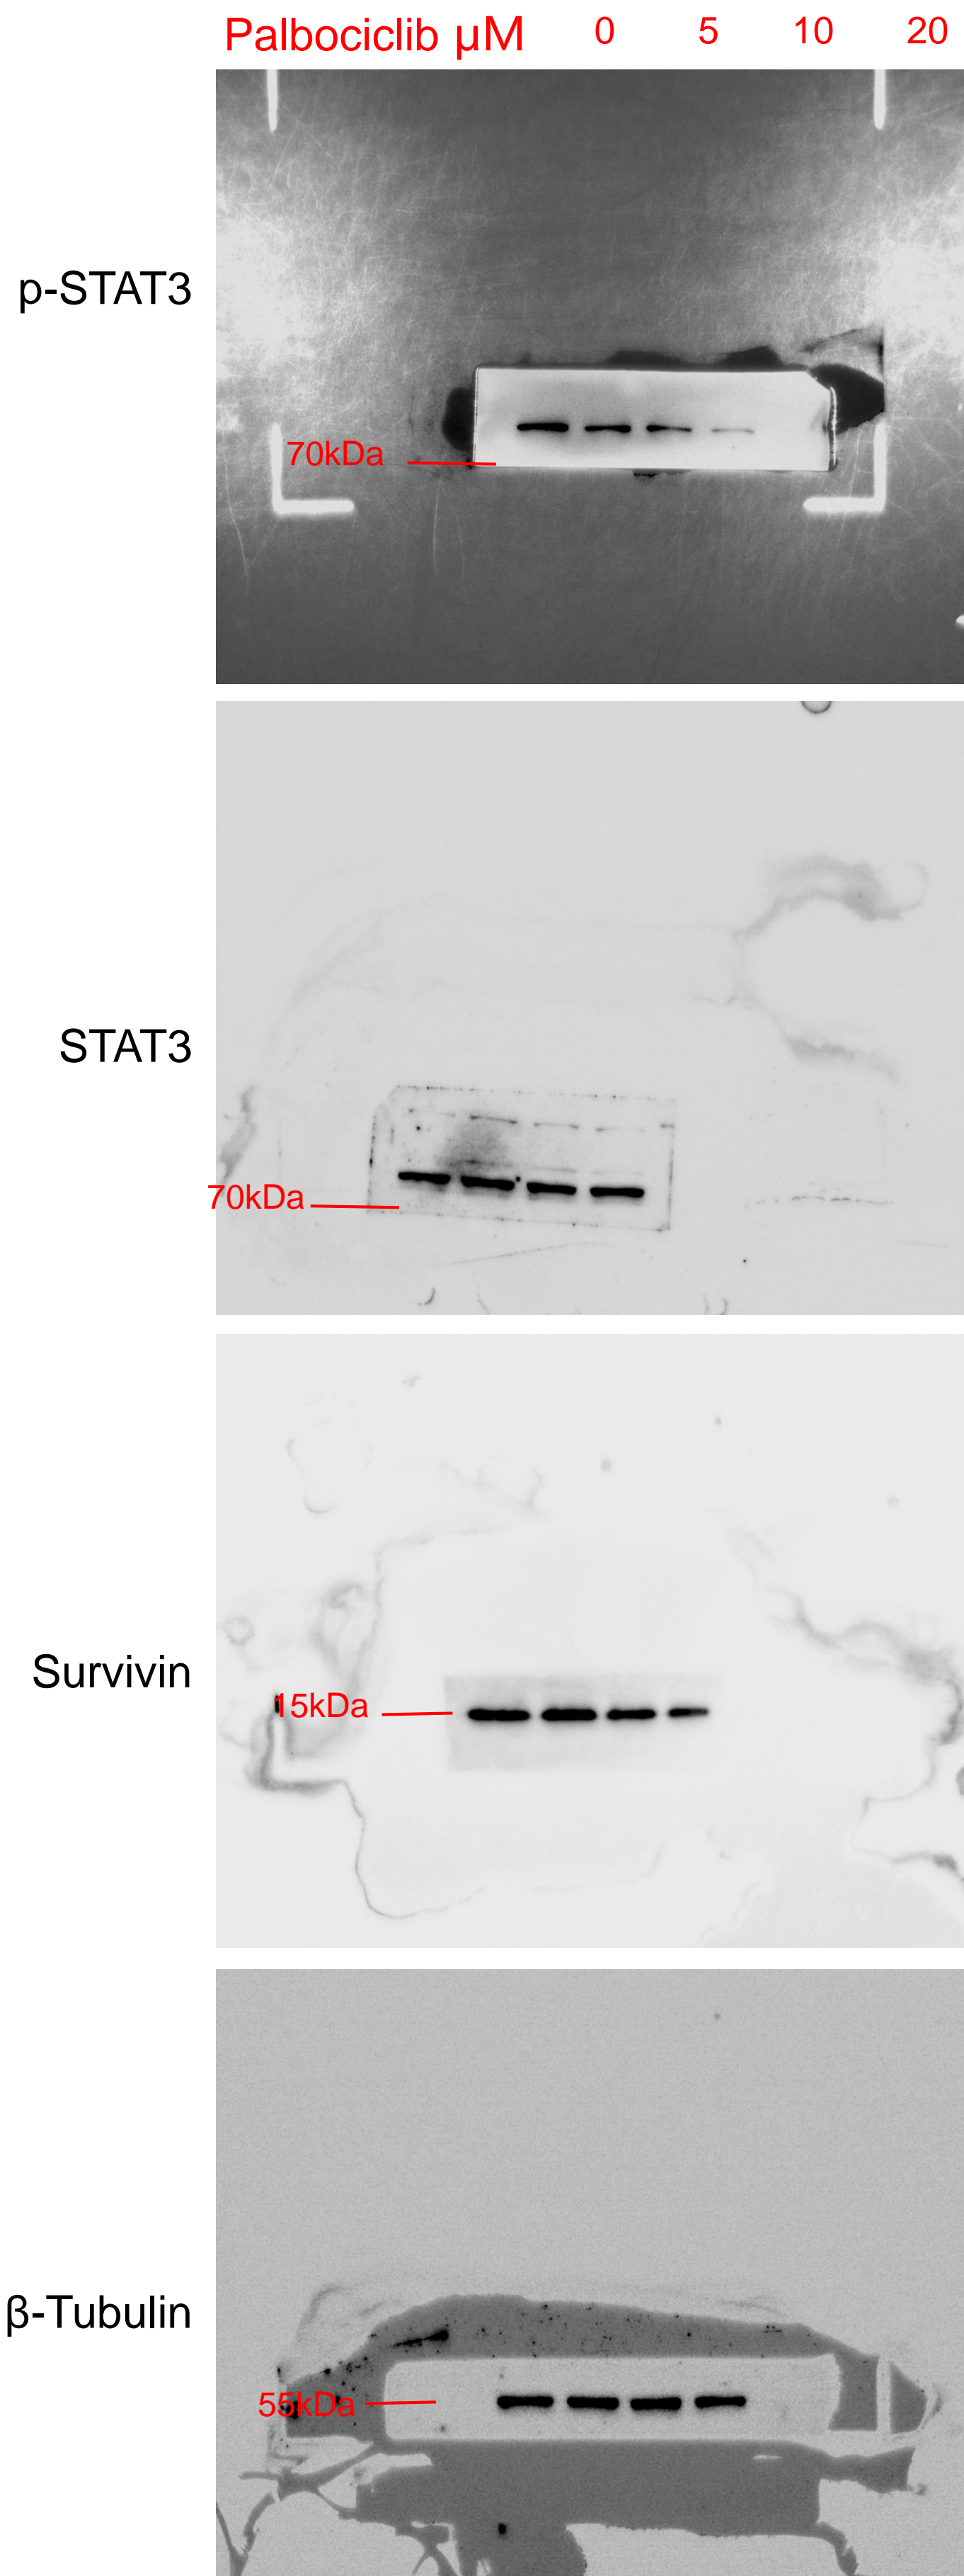

Figure 2A H226

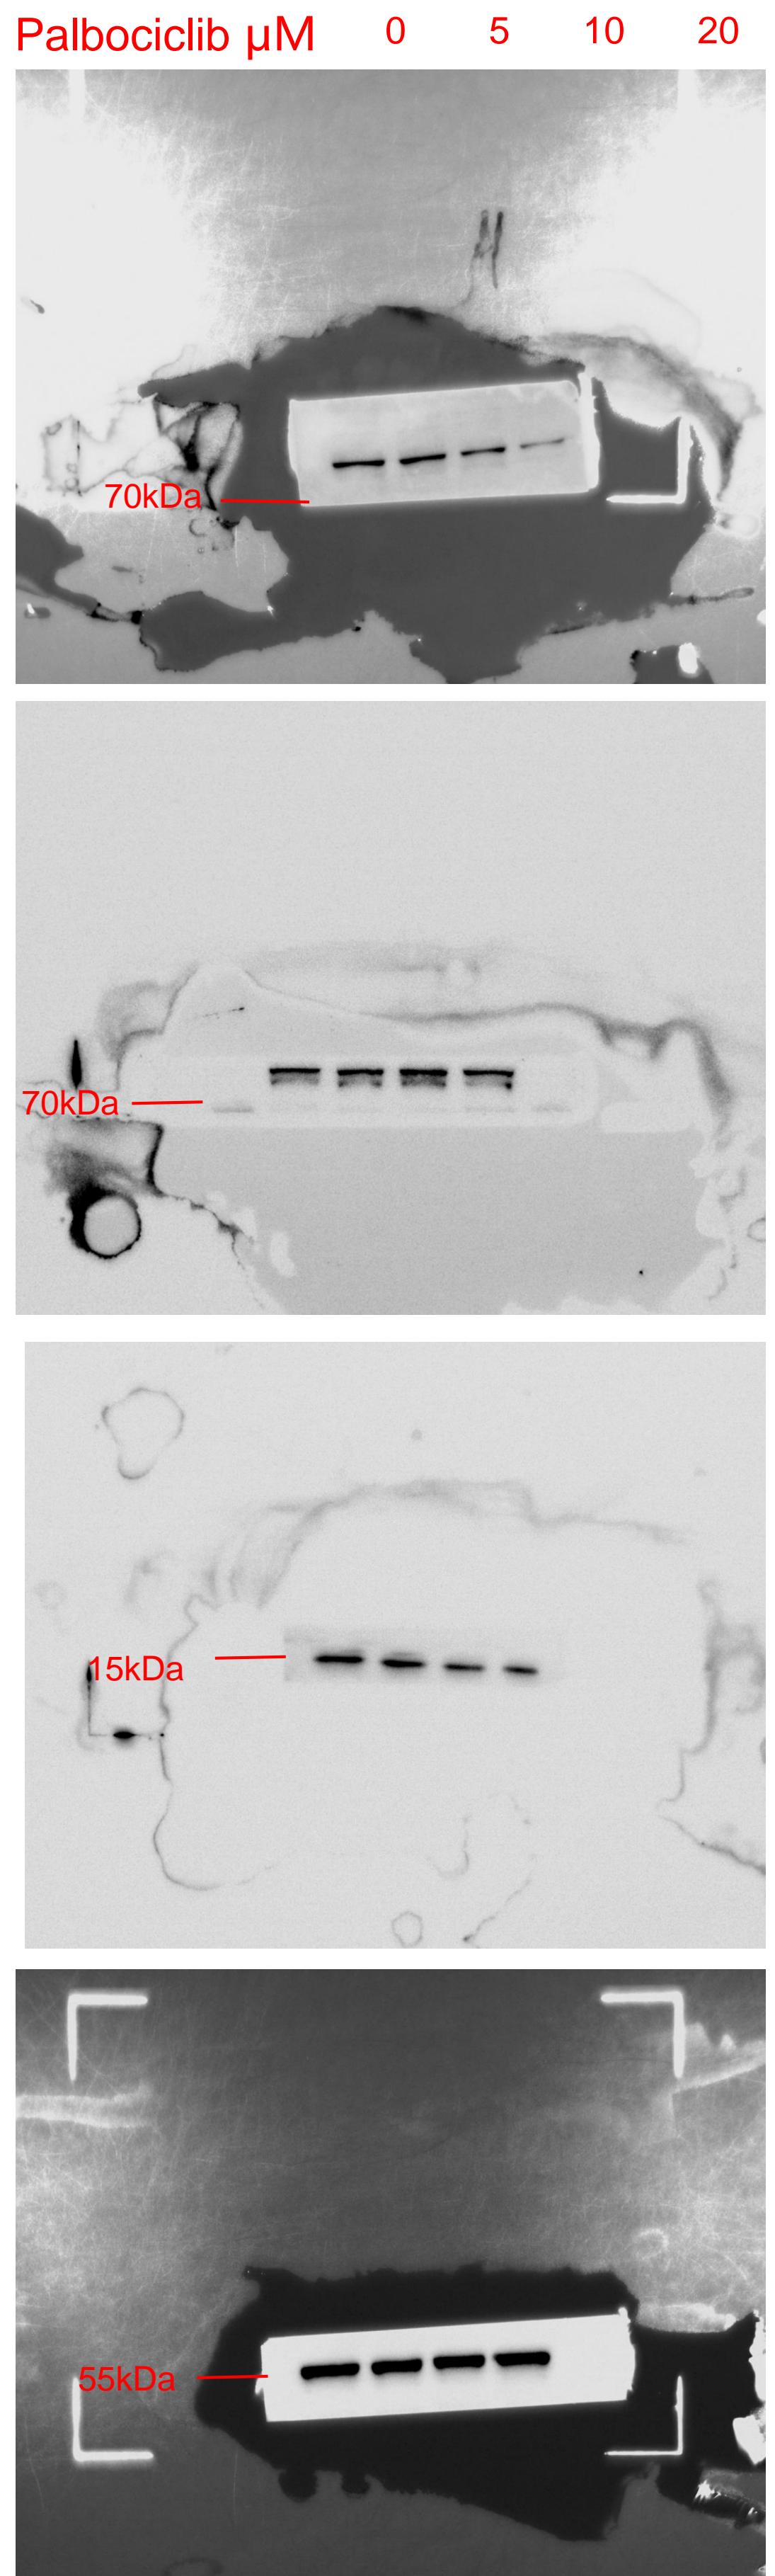

**Figure S1.** The original image Western blotting of Figure 2A.



Figure 2B     H520

|             |   |   |   |   |
|-------------|---|---|---|---|
| Palbociclib | - | + | - | + |
| Stattic     | - | - | + | + |

p-STAT3

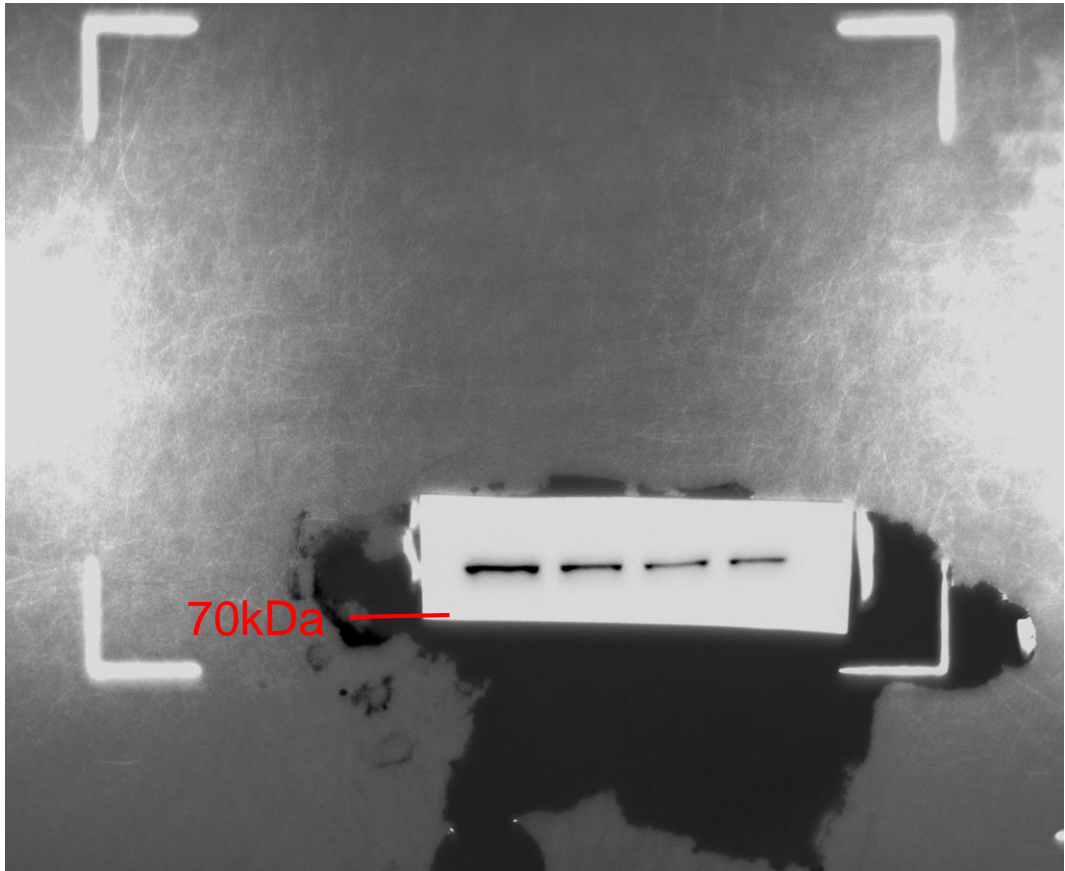

STAT3

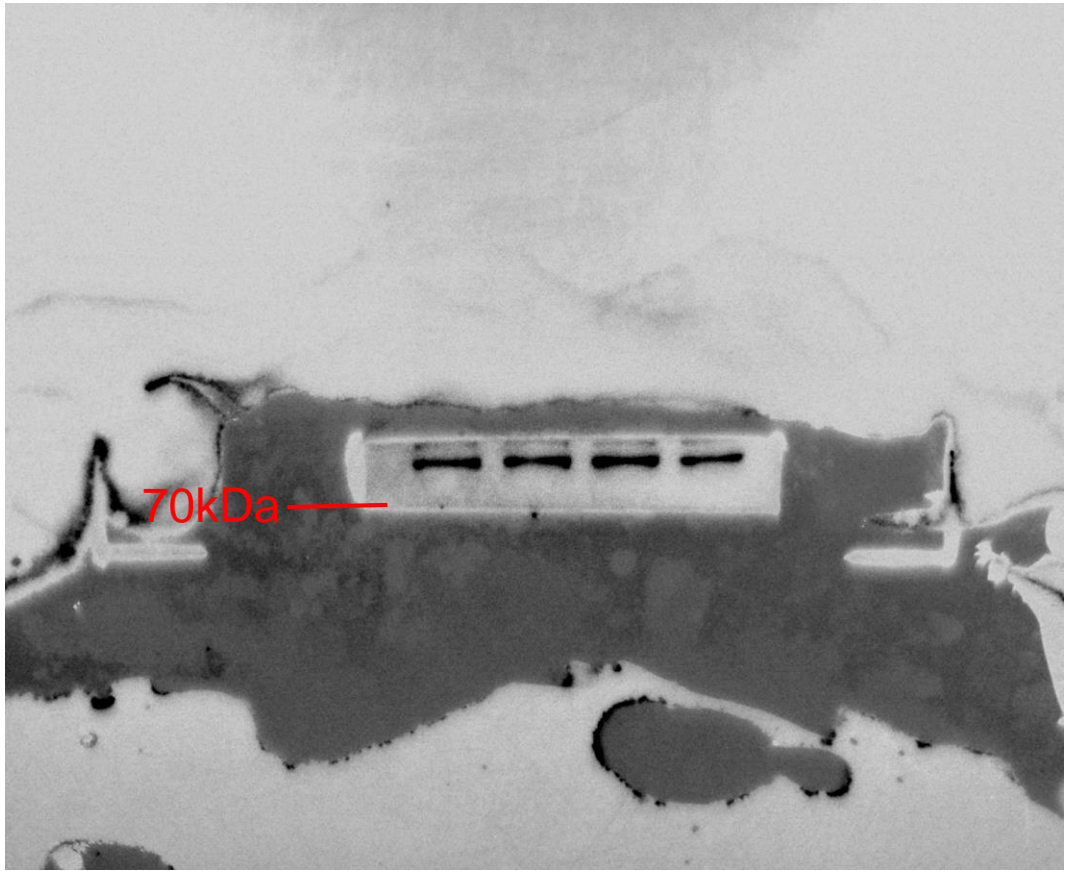

$\beta$ -Tubulin

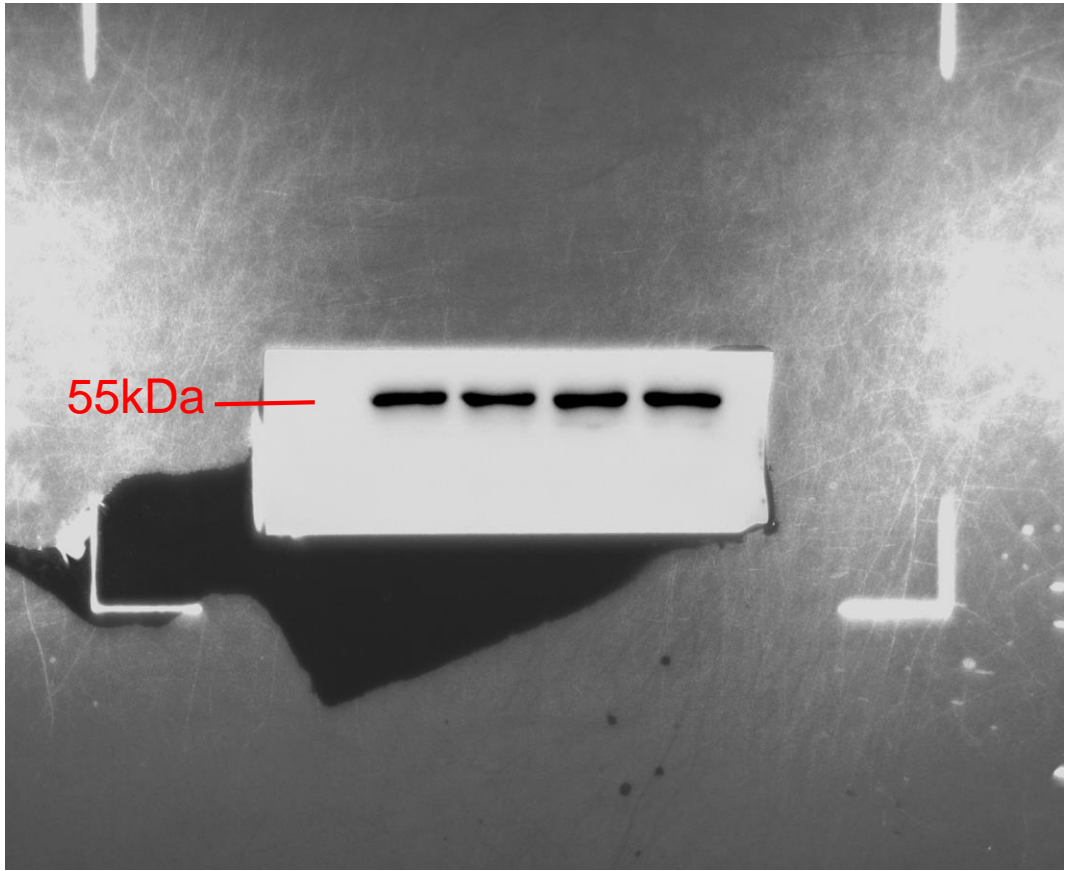

Figure 2B     H226

|             |   |   |   |   |
|-------------|---|---|---|---|
| Palbociclib | - | + | - | + |
| Stattic     | - | - | + | + |

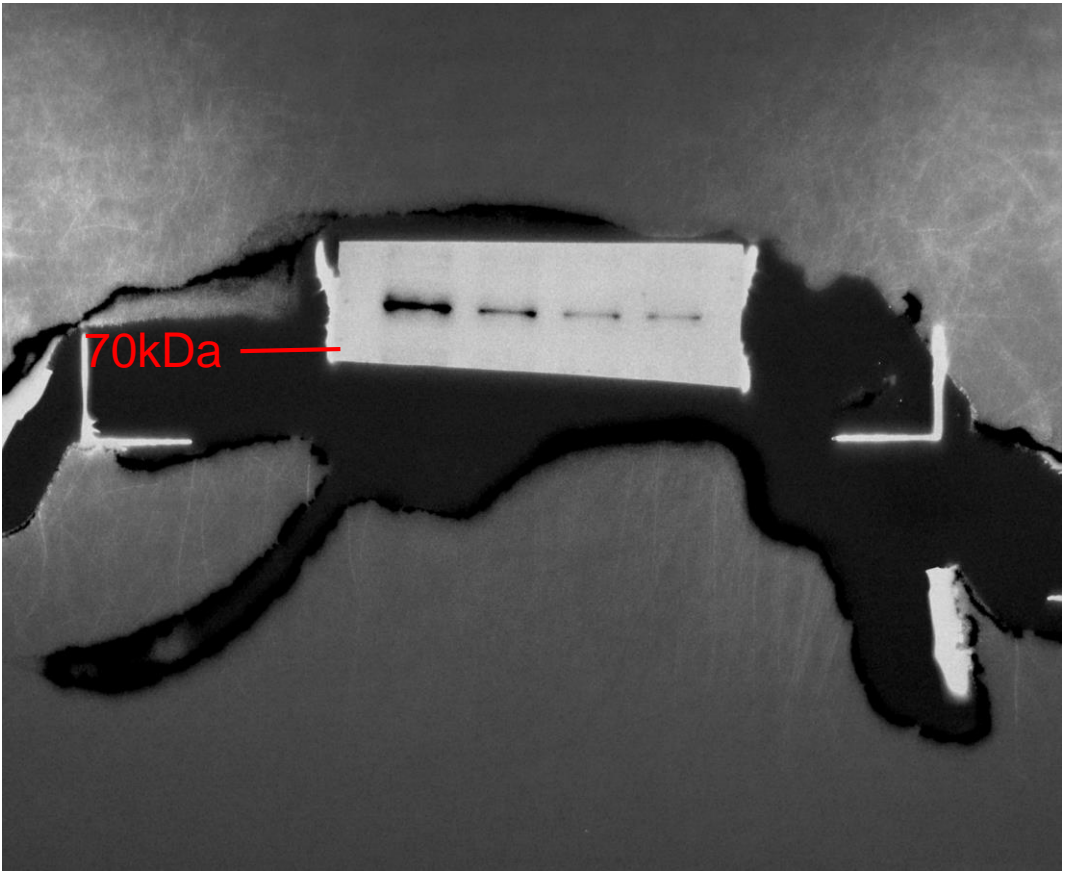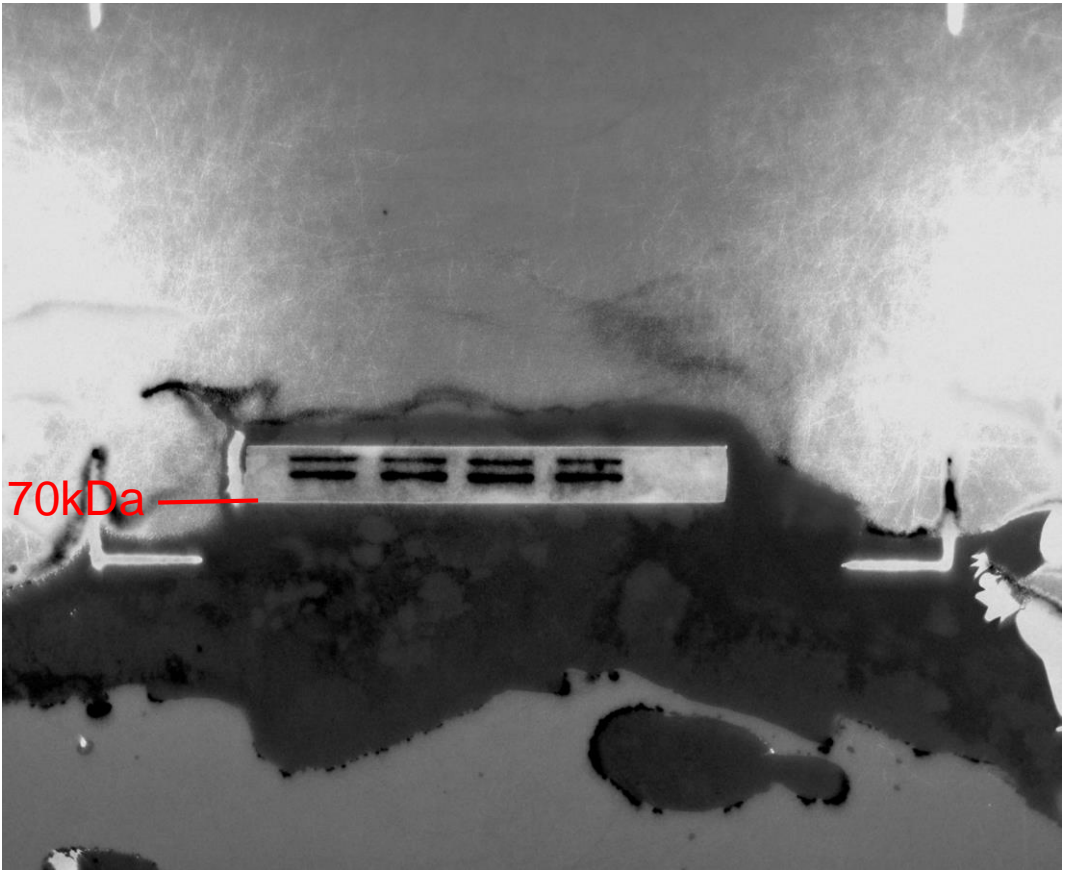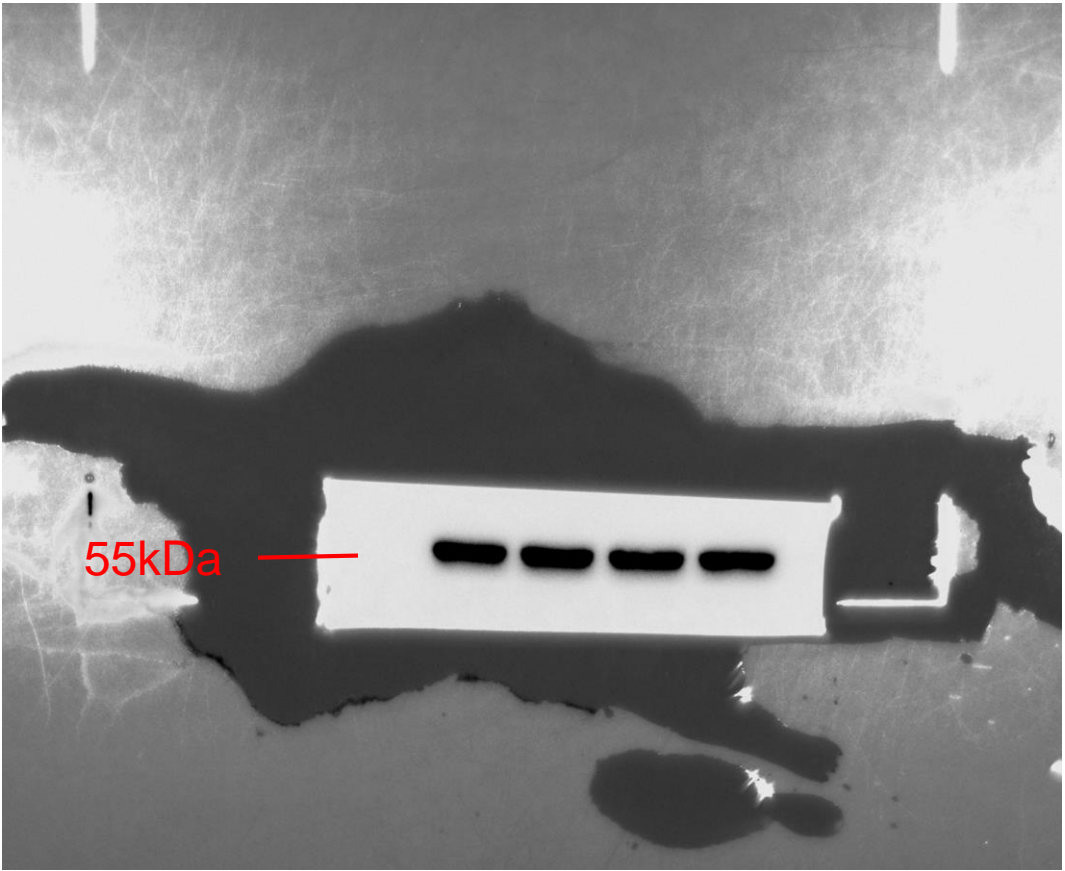

Figure S2. The original image Western blotting of Figure 2B.



Figure 3A H520

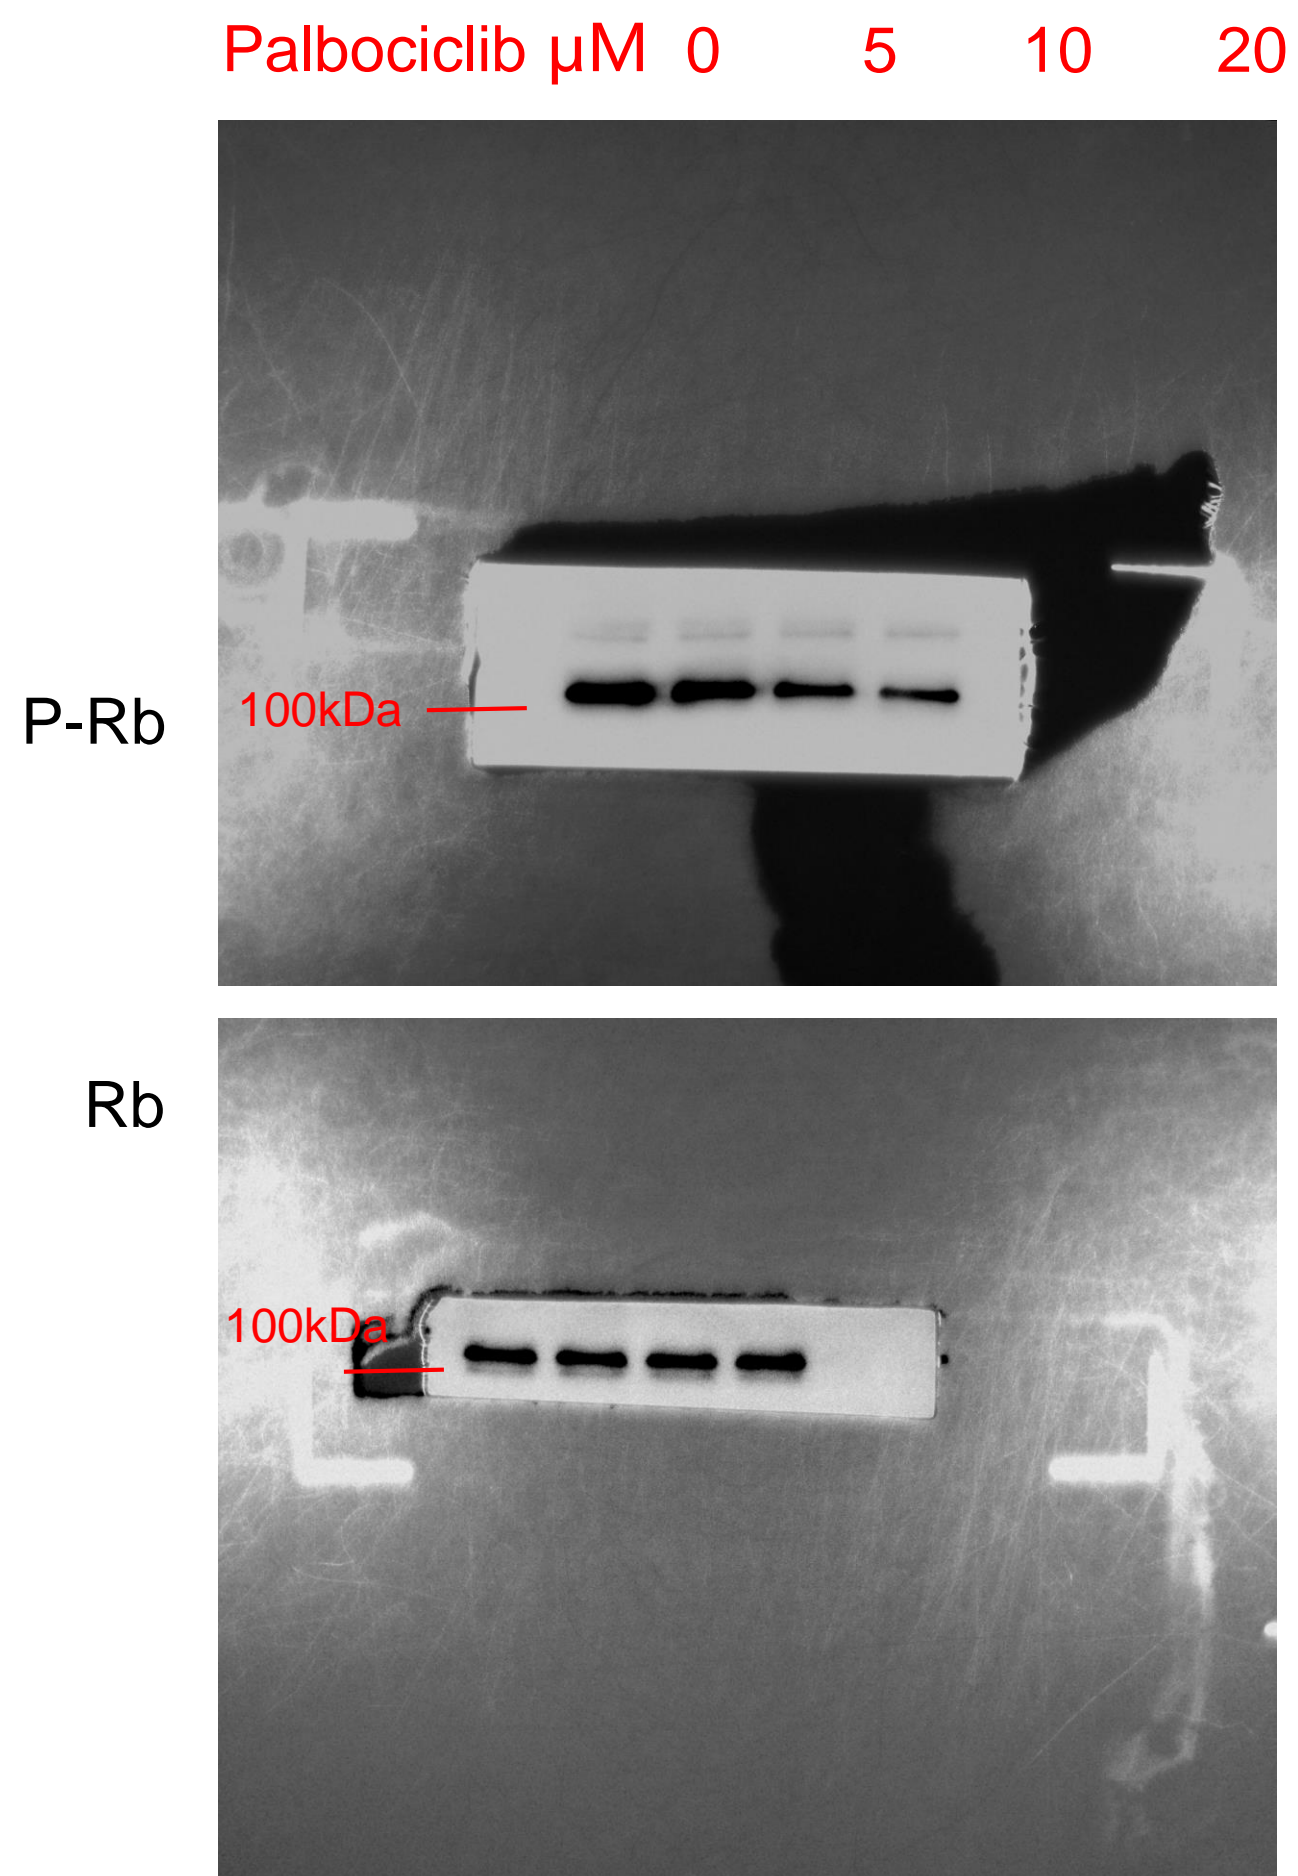

Figure 3A H226

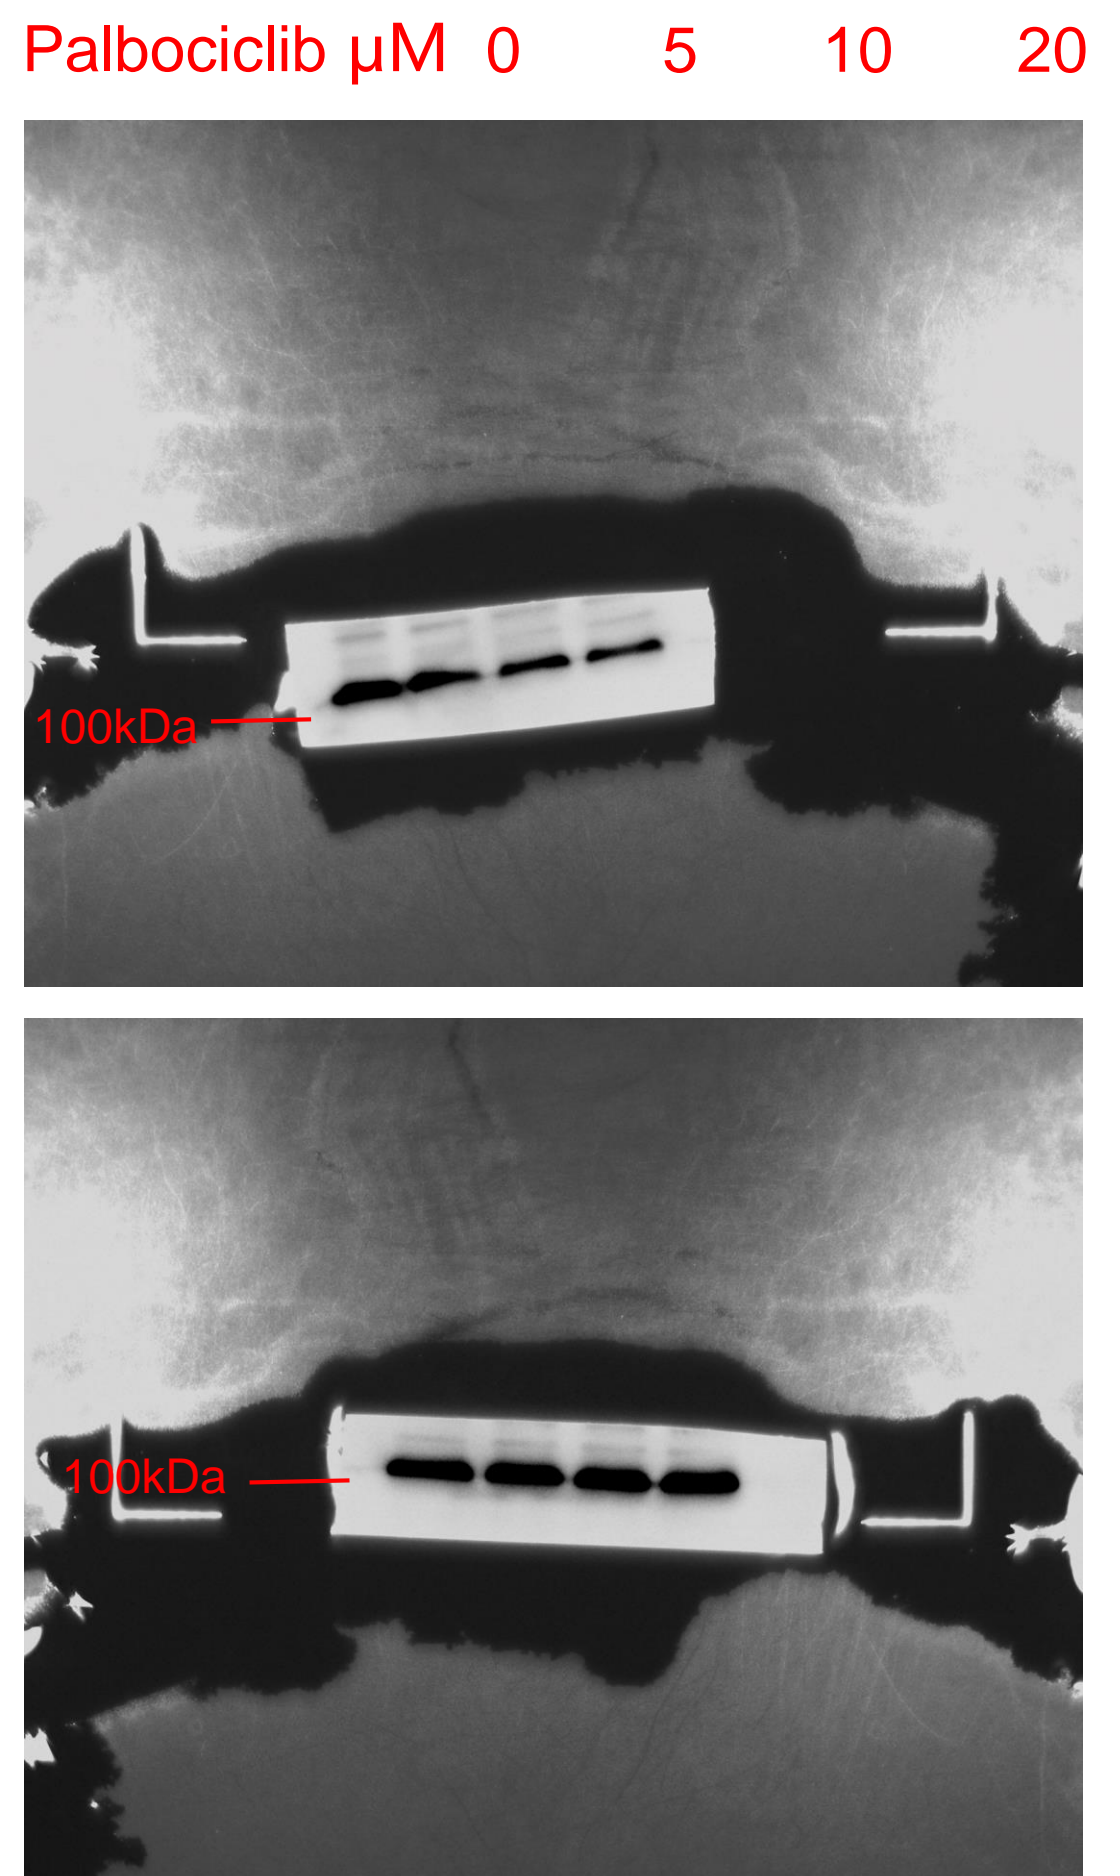

**Figure S3.** The original image Western blotting of Figure 3A.

Figure 3B H520

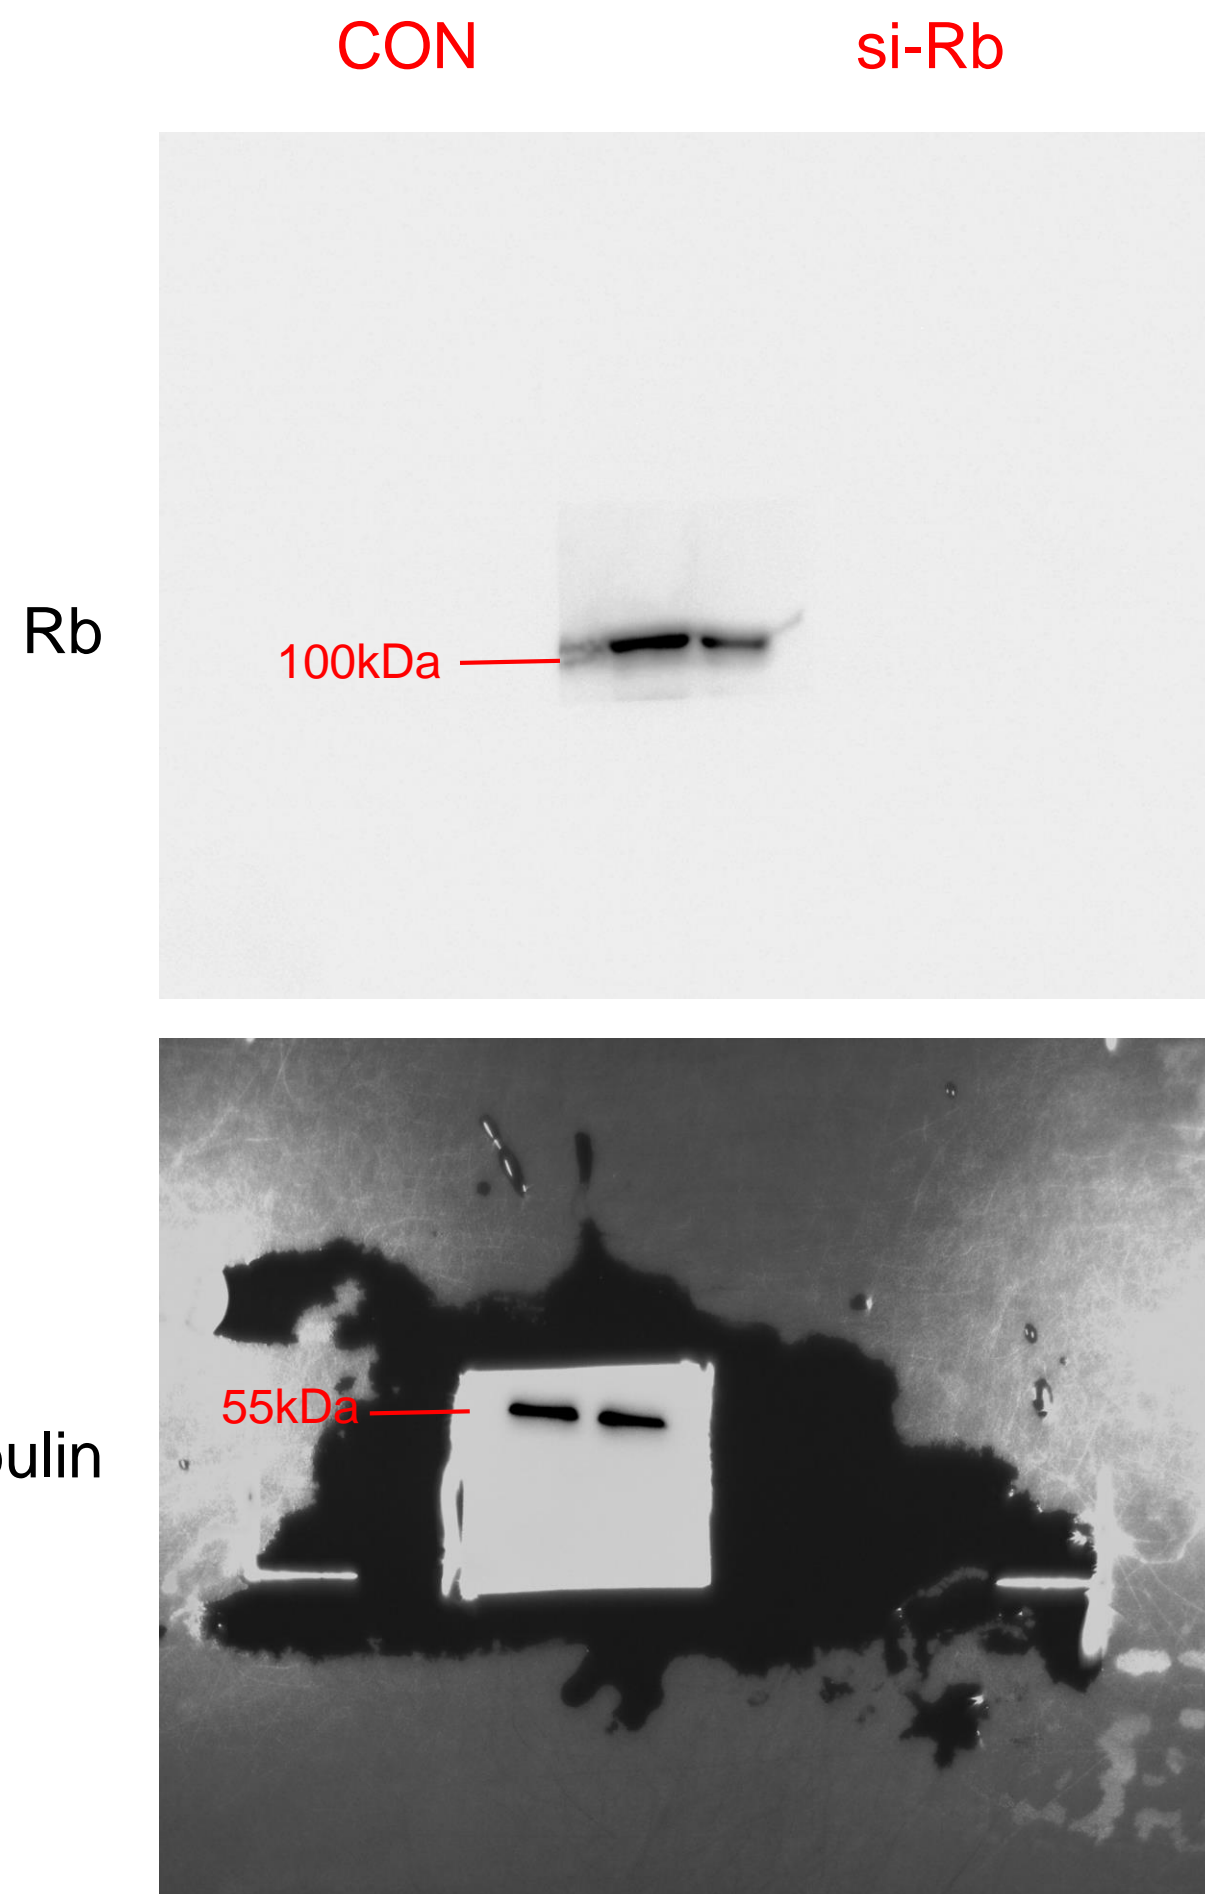

Figure 3B H226

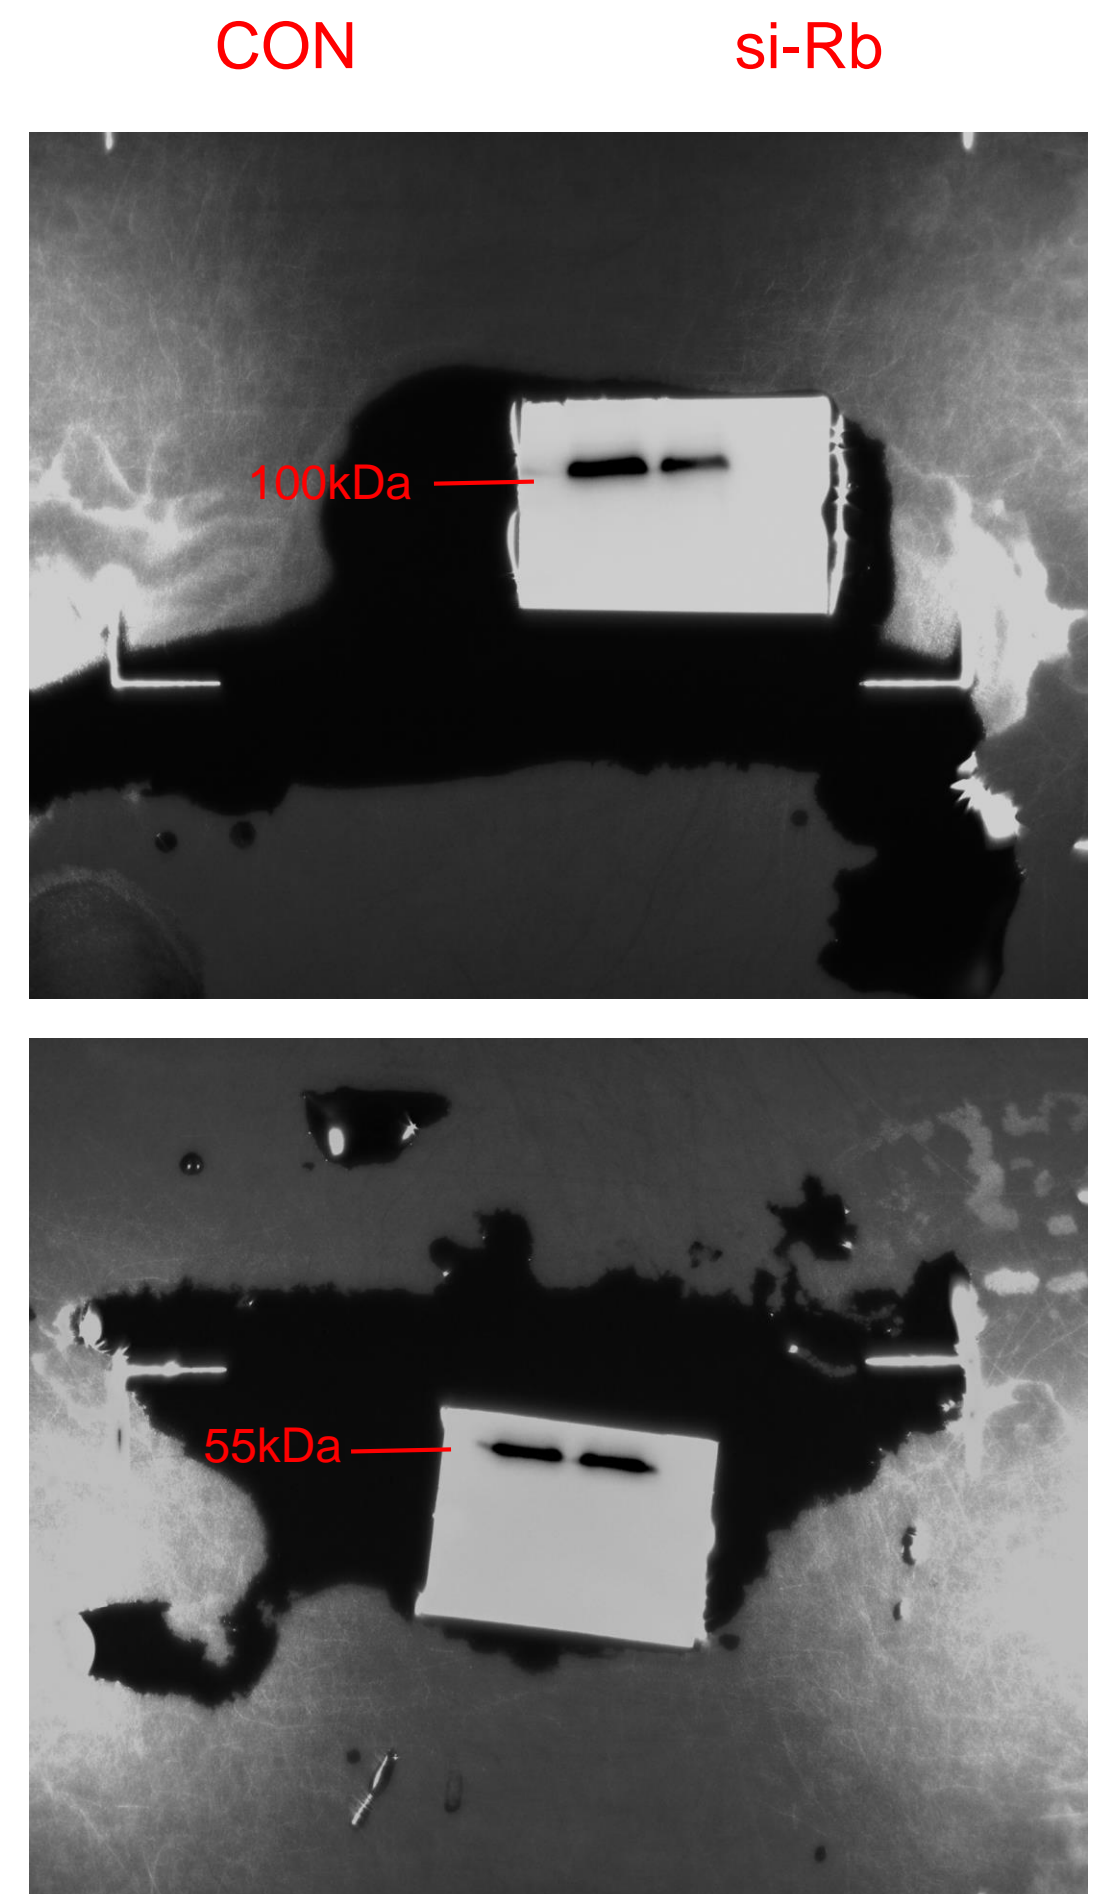

**Figure S4.** The original image Western blotting of Figure 3B.



Figure 3C H520

|             |   |   |   |
|-------------|---|---|---|
| Palbociclib | - | - | + |
| si-Rb       | - | + | + |

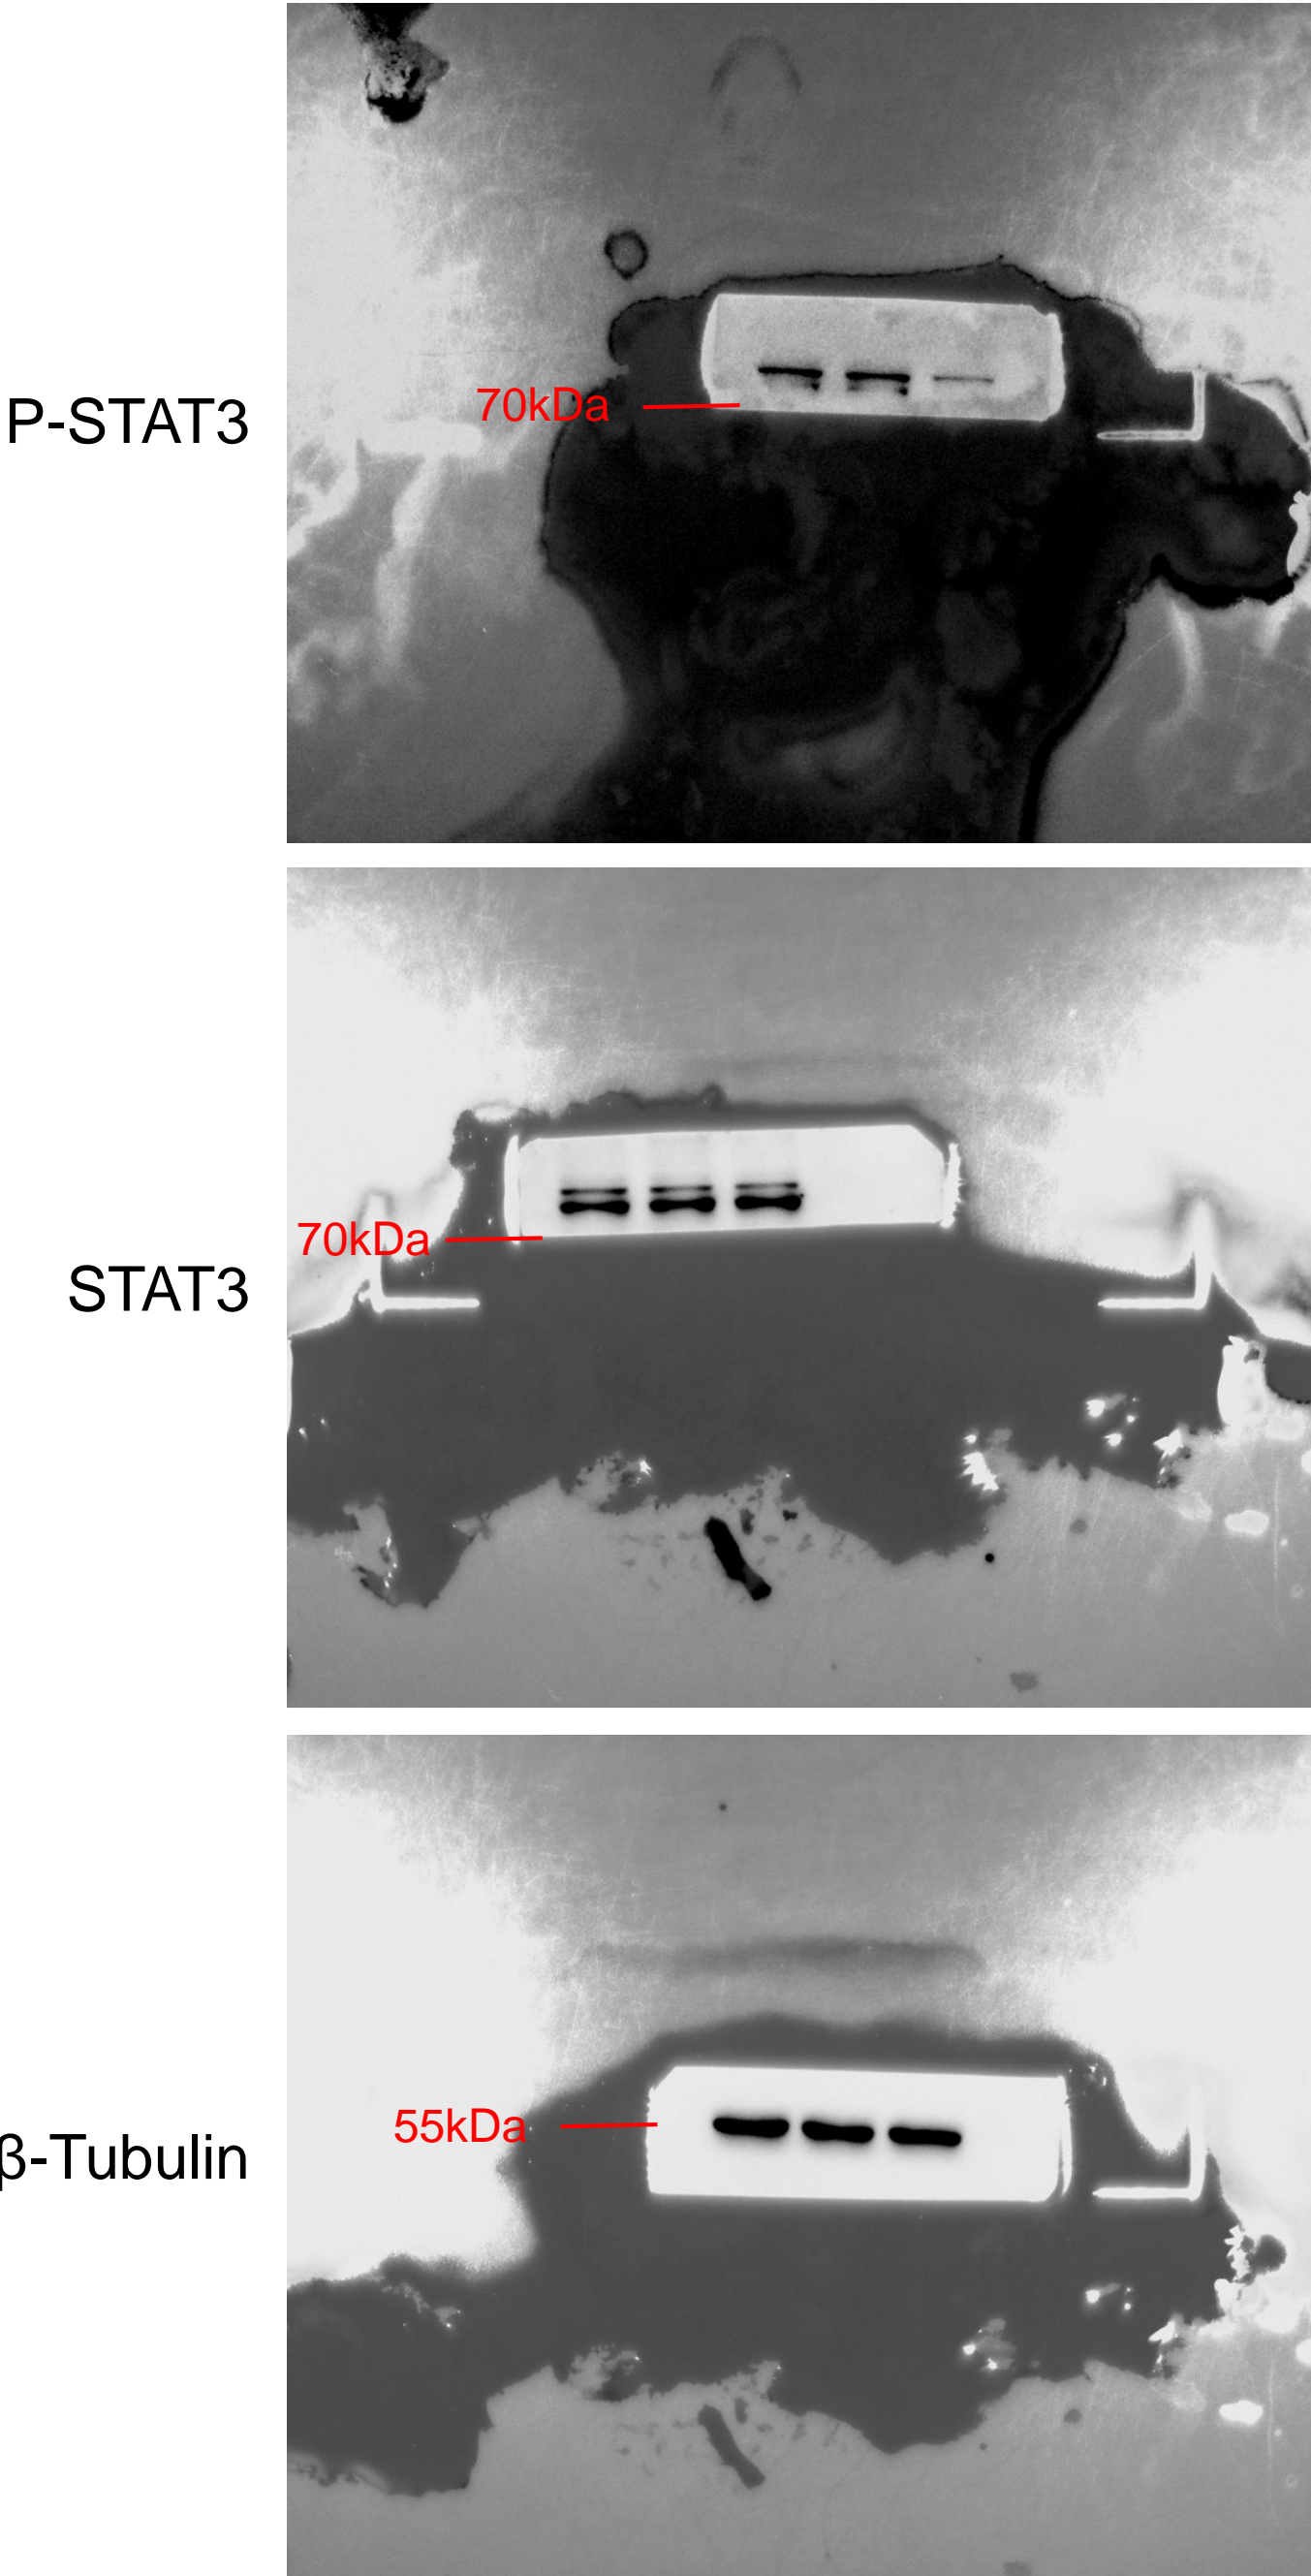

Figure 3C H226

|             |   |   |   |
|-------------|---|---|---|
| Palbociclib | - | - | + |
| si-Rb       | - | + | + |

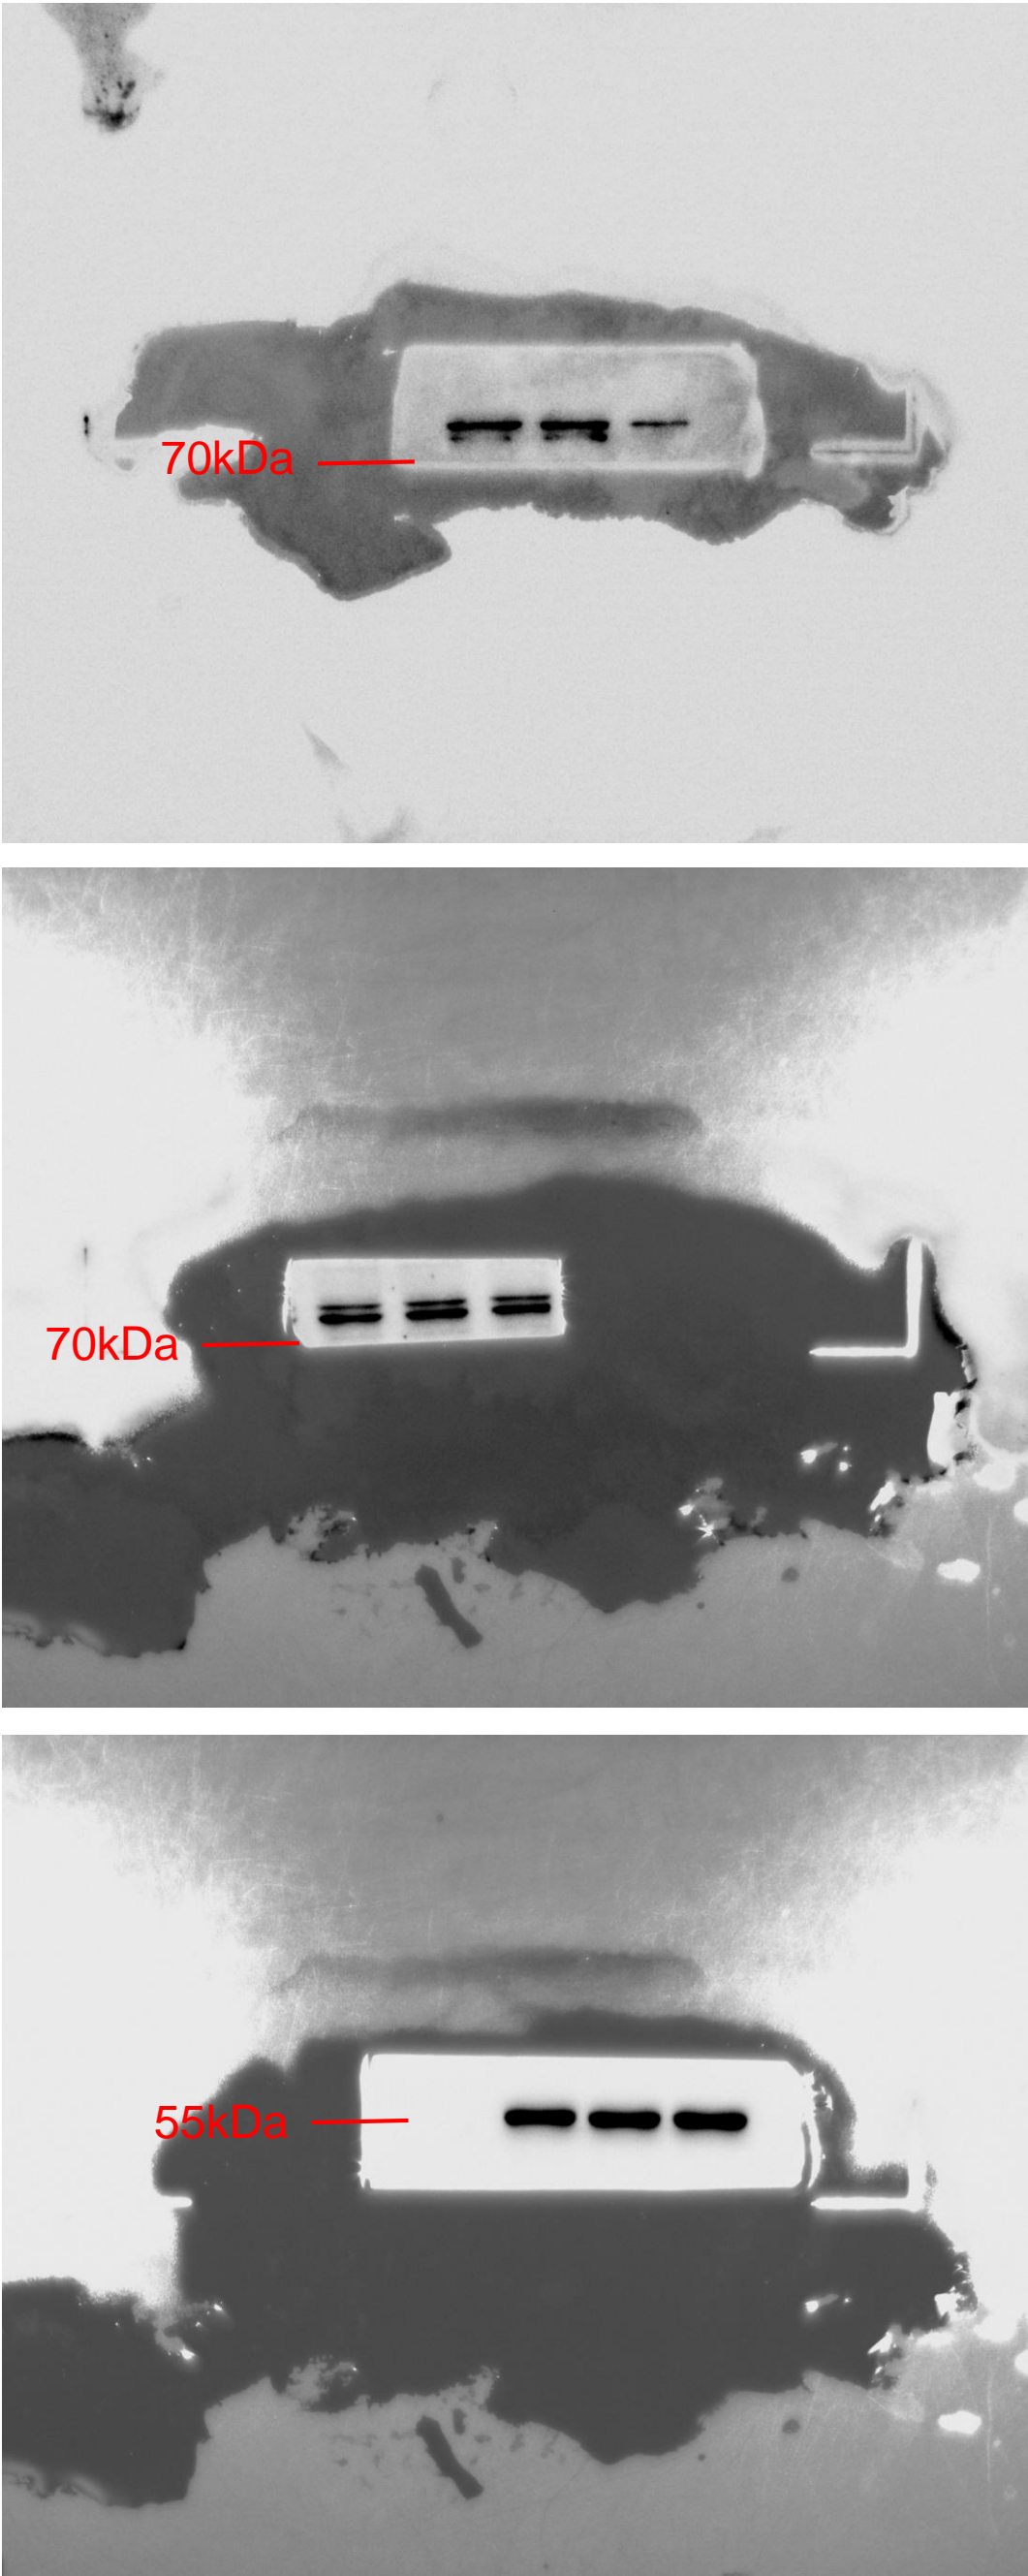

Figure S5. The original image Western blotting of Figure 3C.



Figure 4A H520

Figure 4A H226

Palbociclib  $\mu$ M 0 5 10 20

Palbociclib  $\mu$ M 0 5 10 20

P-Smad1/5/9

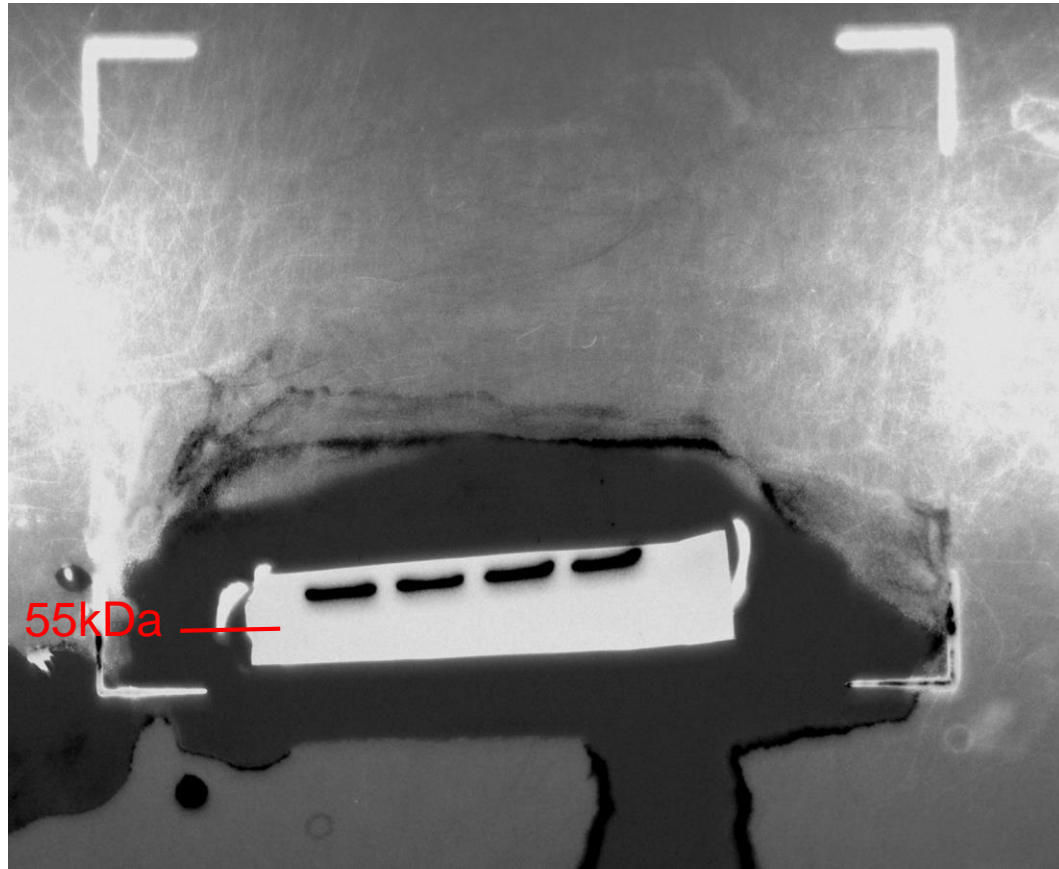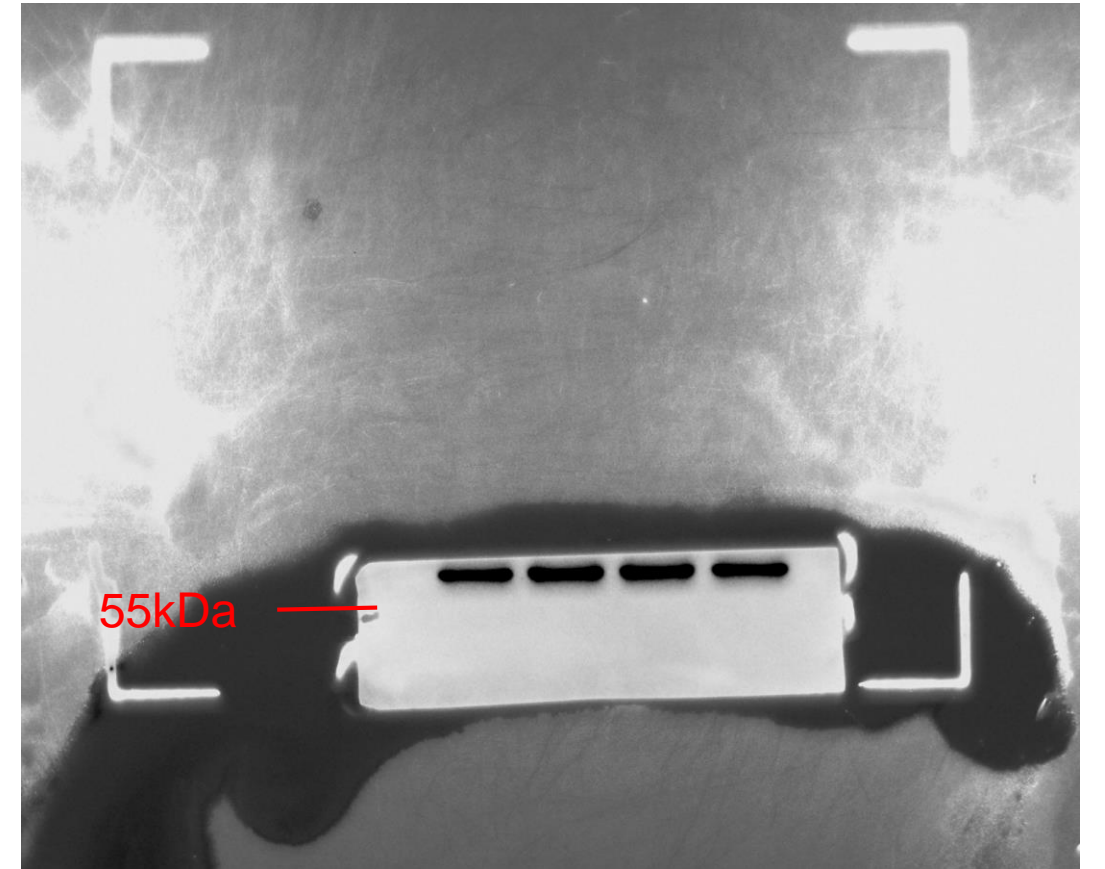

Smad1/5/9

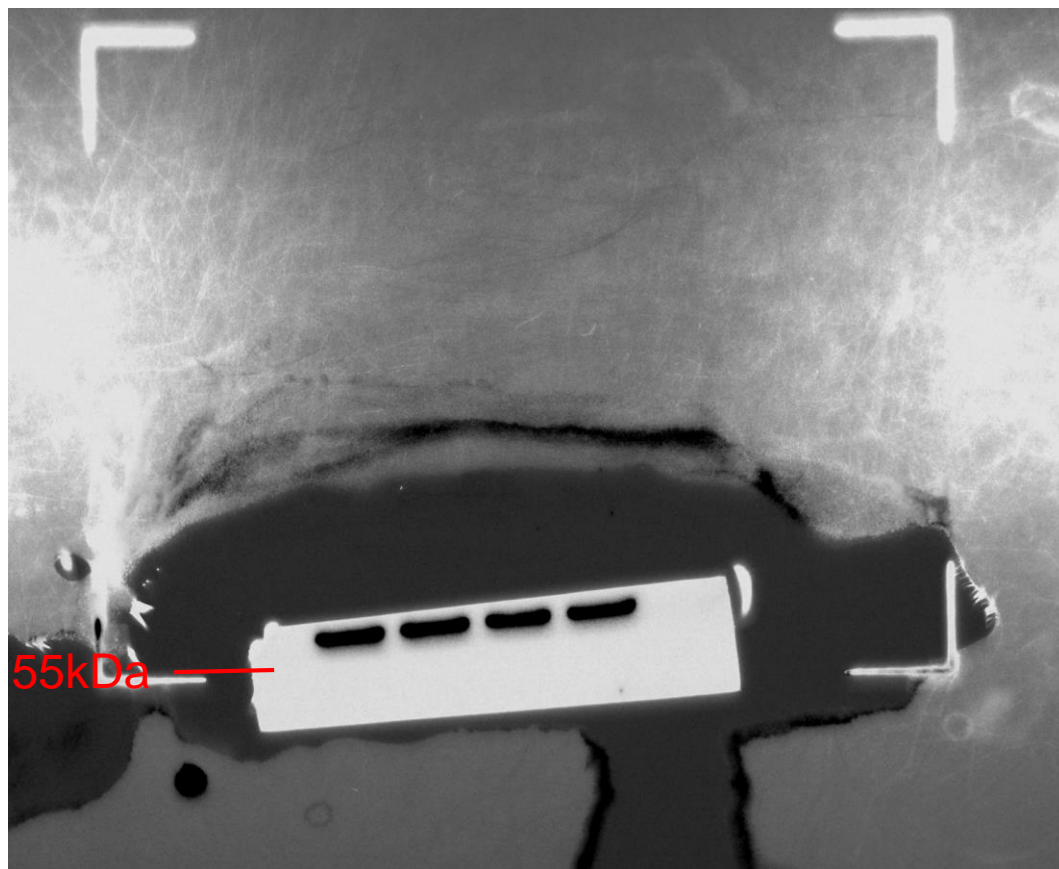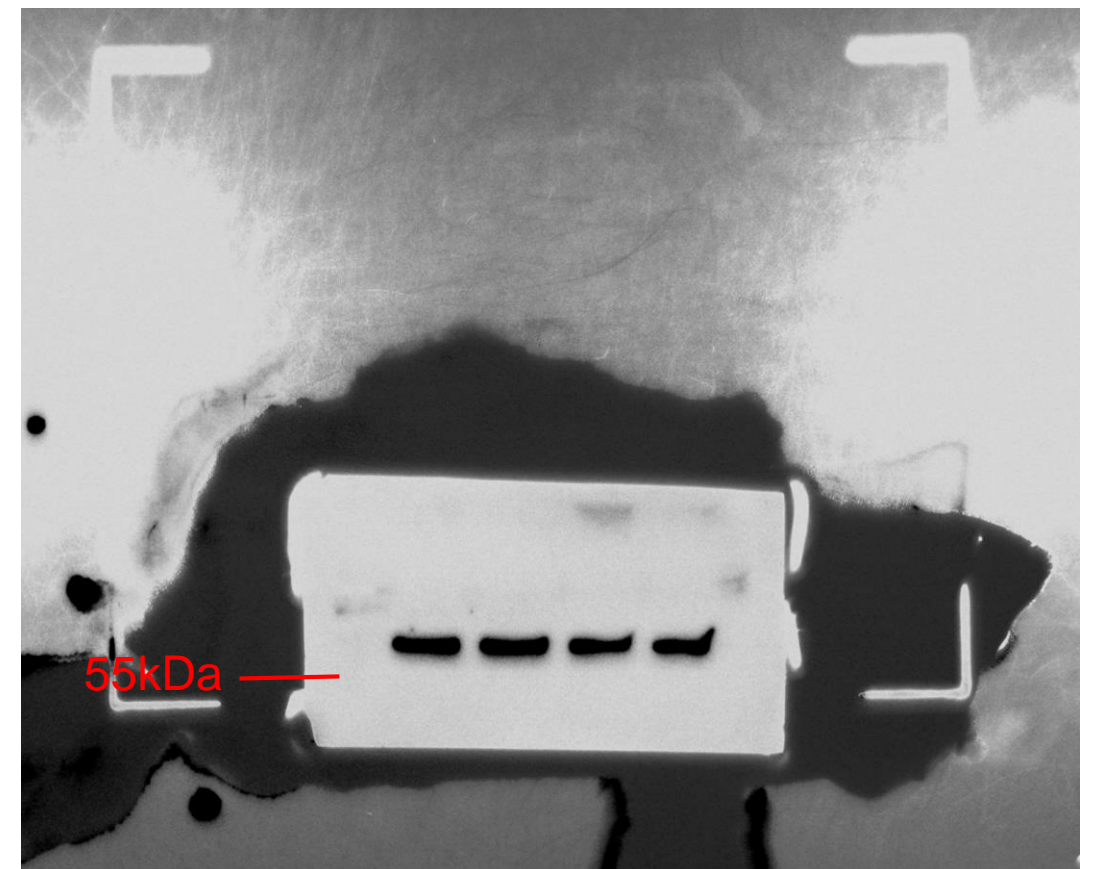

$\beta$ -Tubulin

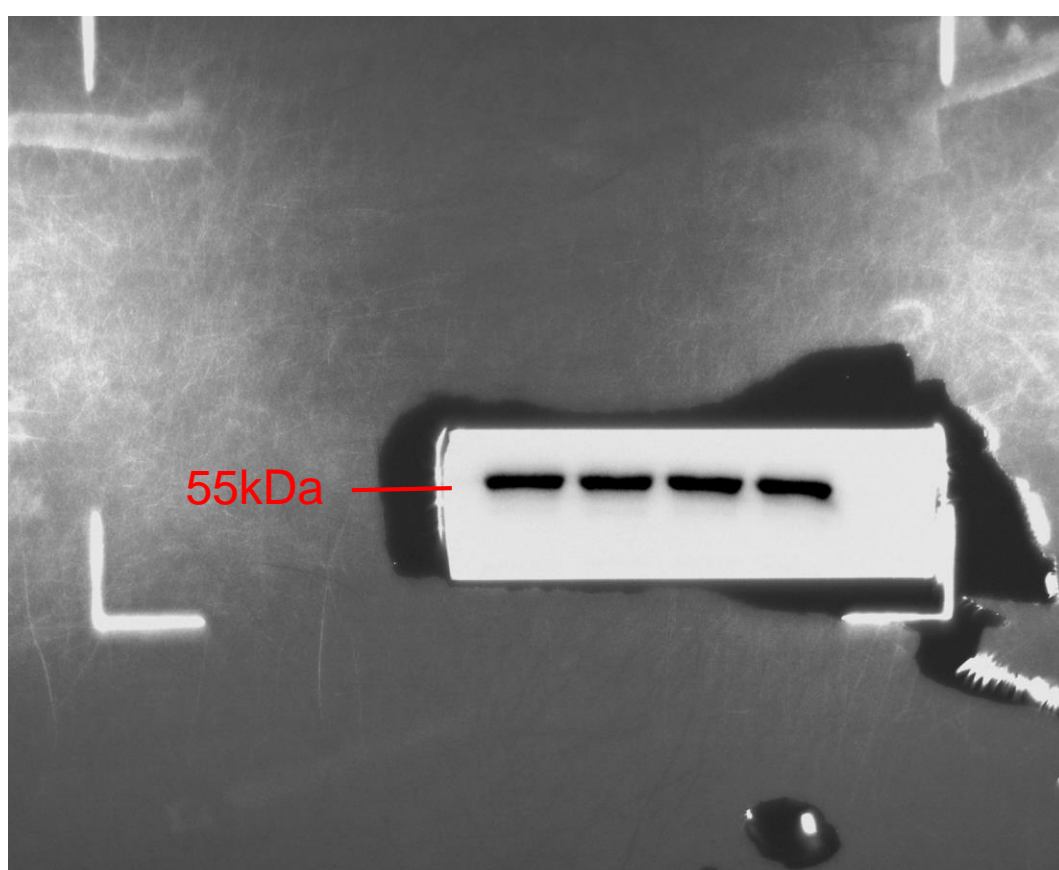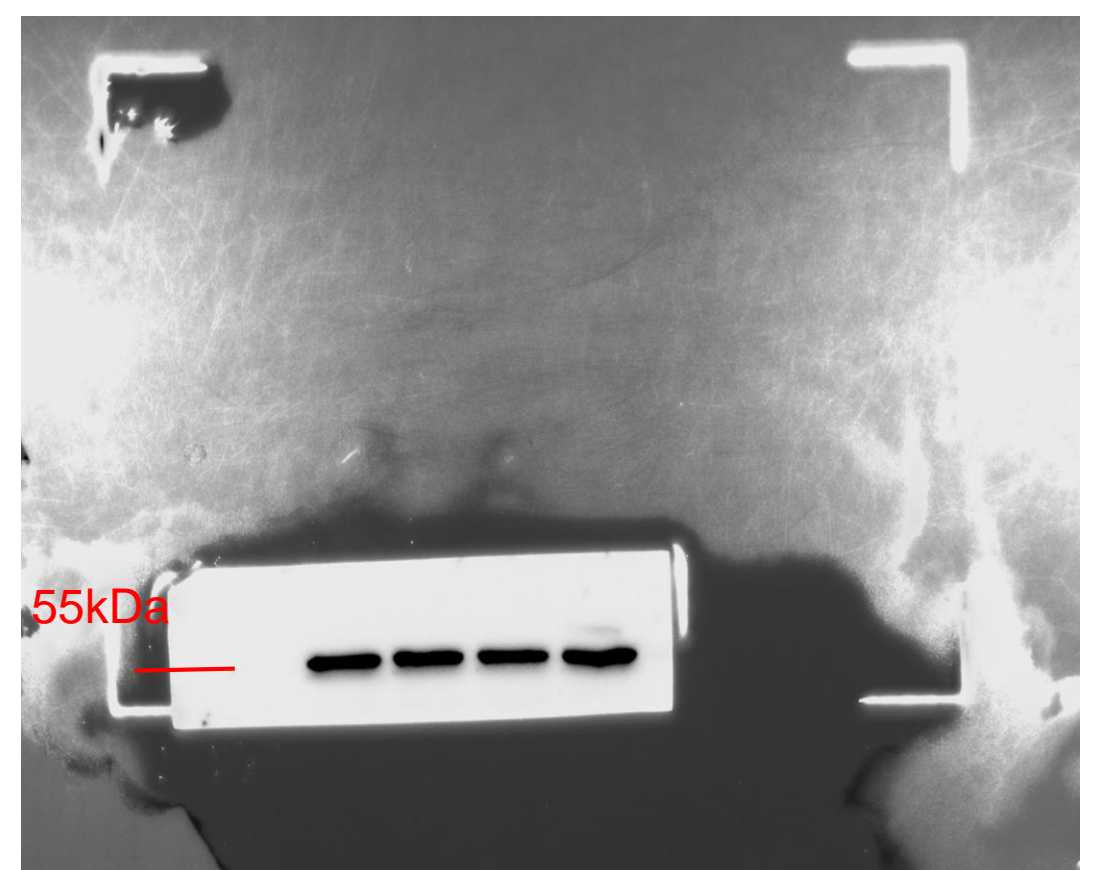

Figure S6. The original image Western blotting of Figure 4A.



Figure 4B H520

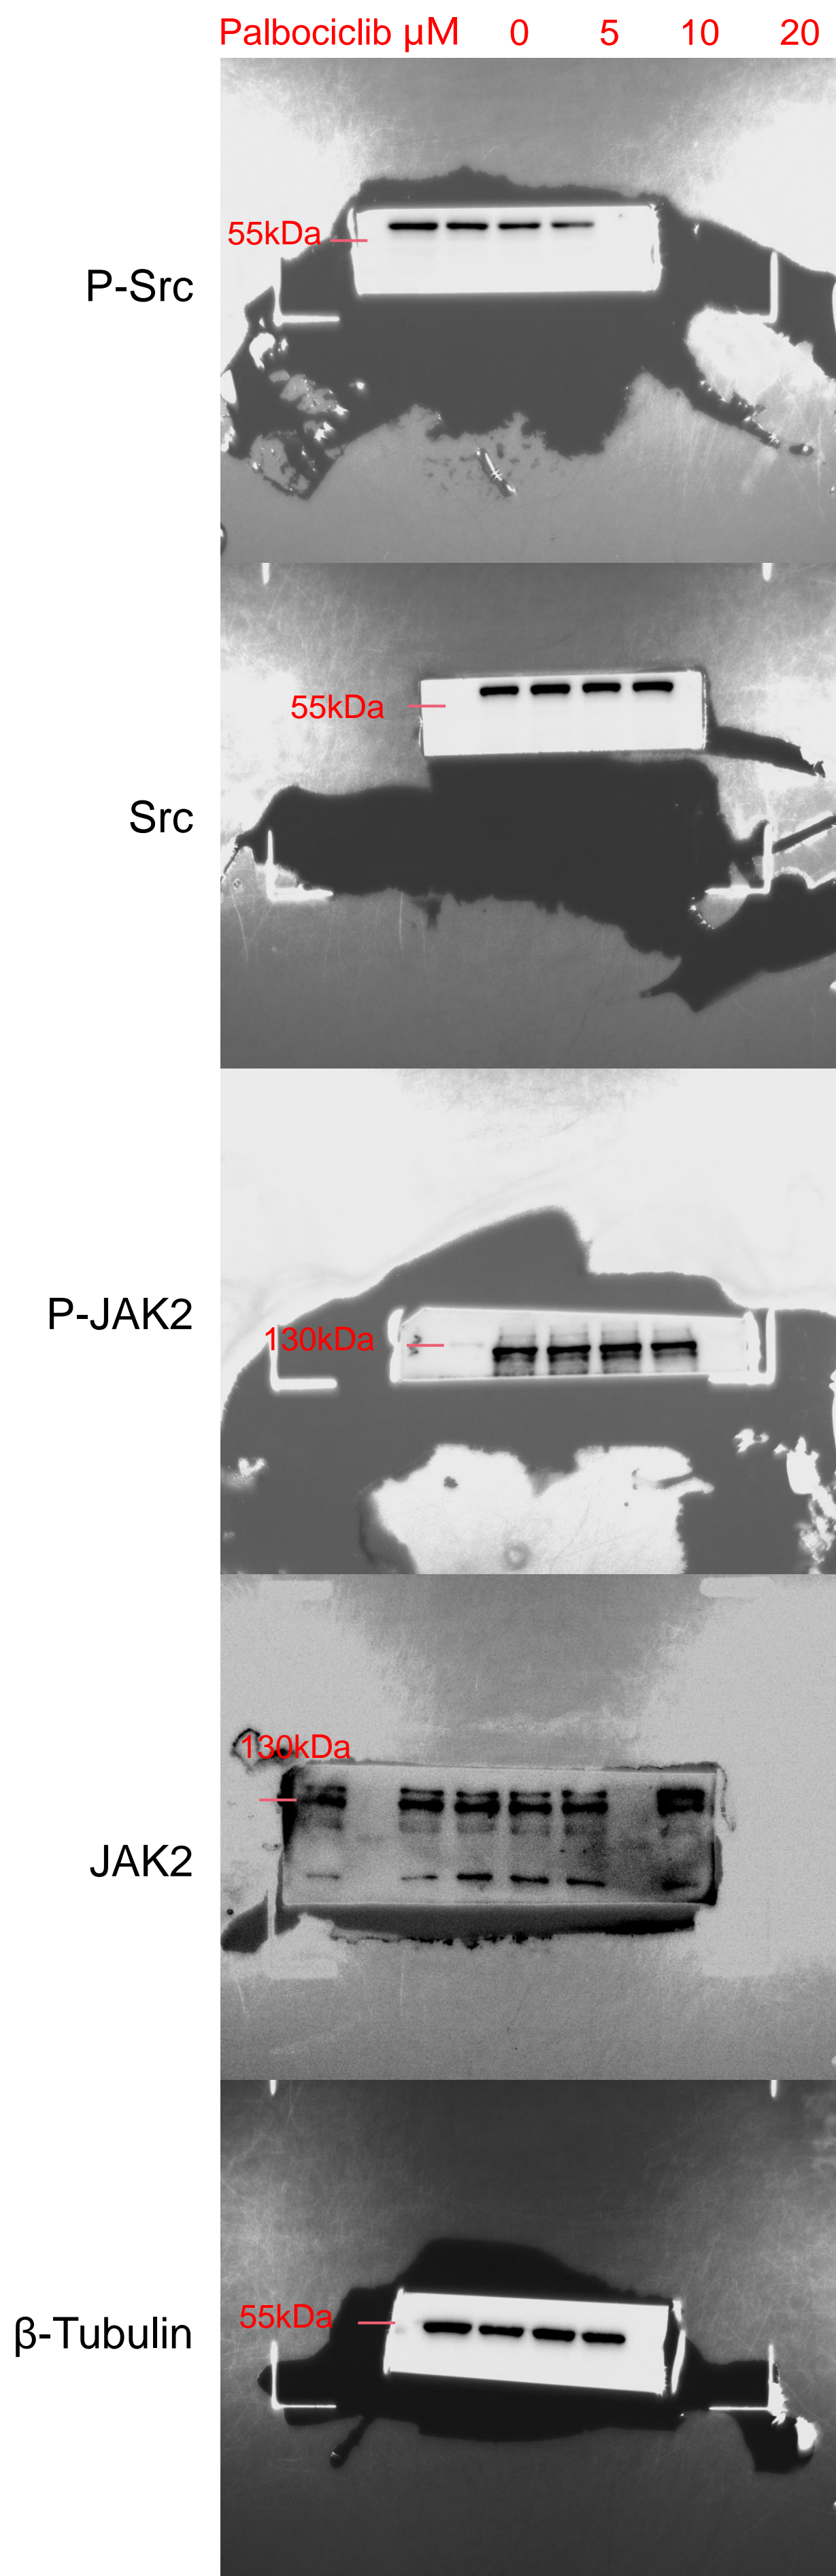

Figure 4B H226

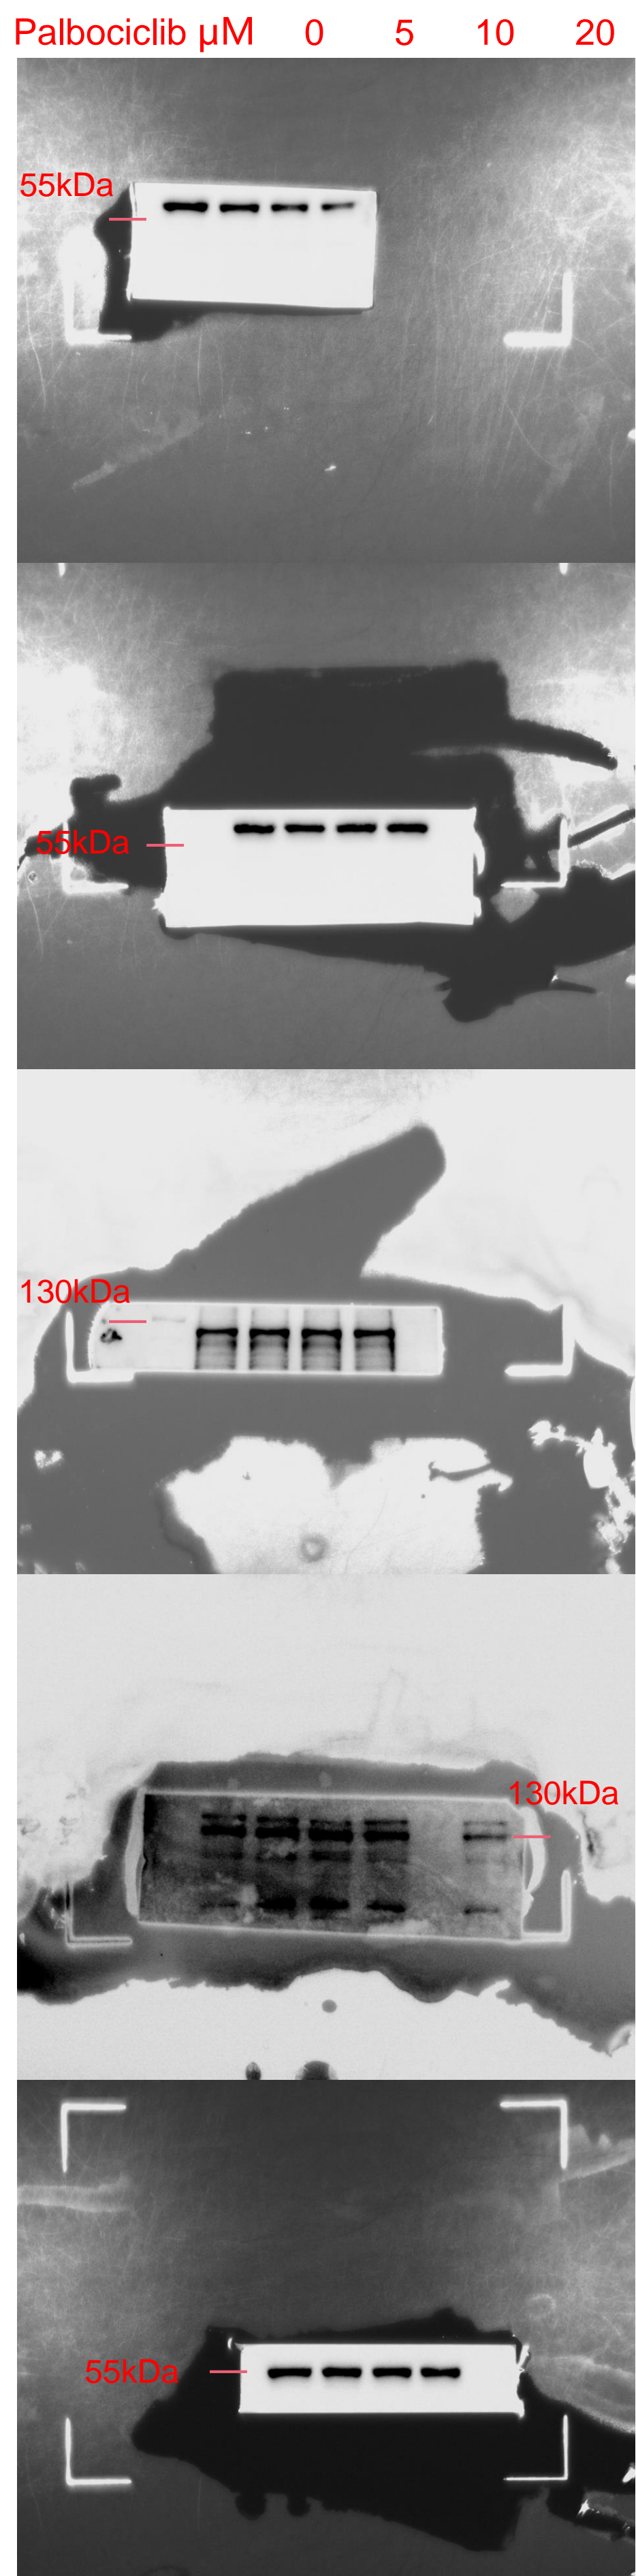

Figure S7. The original image Western blotting of Figure 4B.



Figure 4C H520

|             |   |   |   |   |
|-------------|---|---|---|---|
| Palbociclib | - | + | - | + |
| Stattic     | - | - | + | + |

p-Src

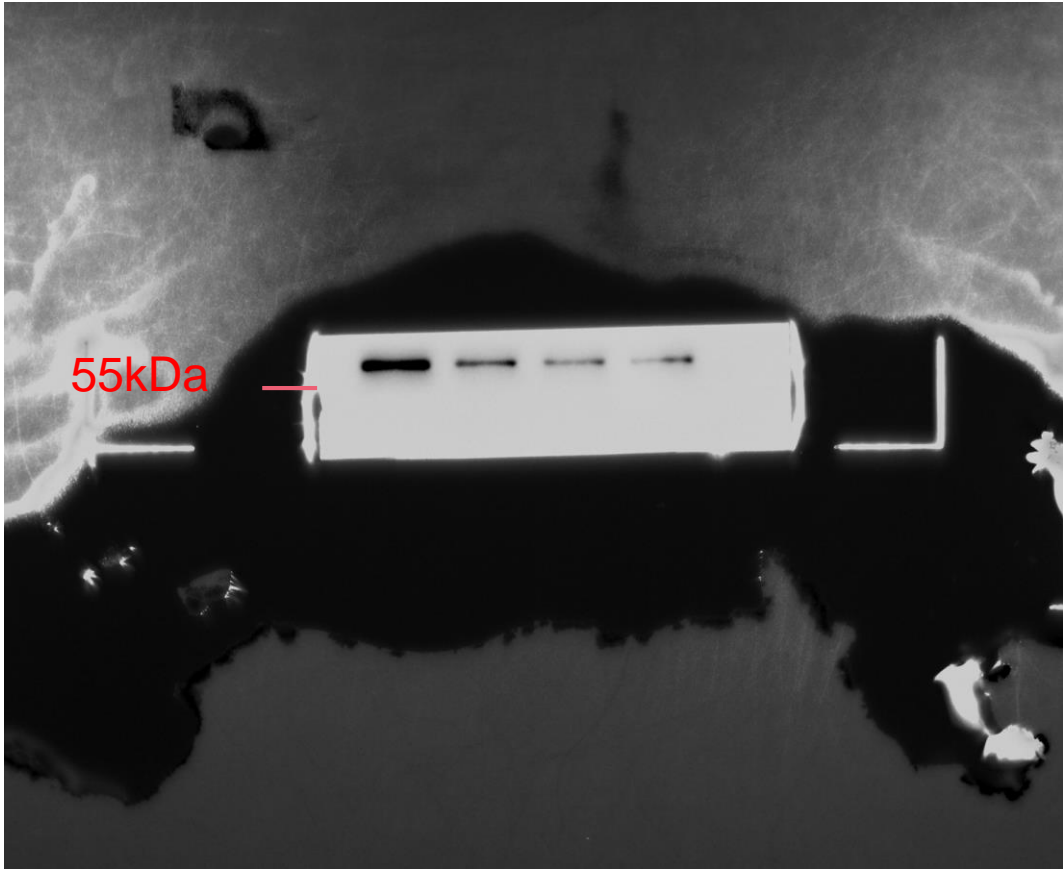

Src

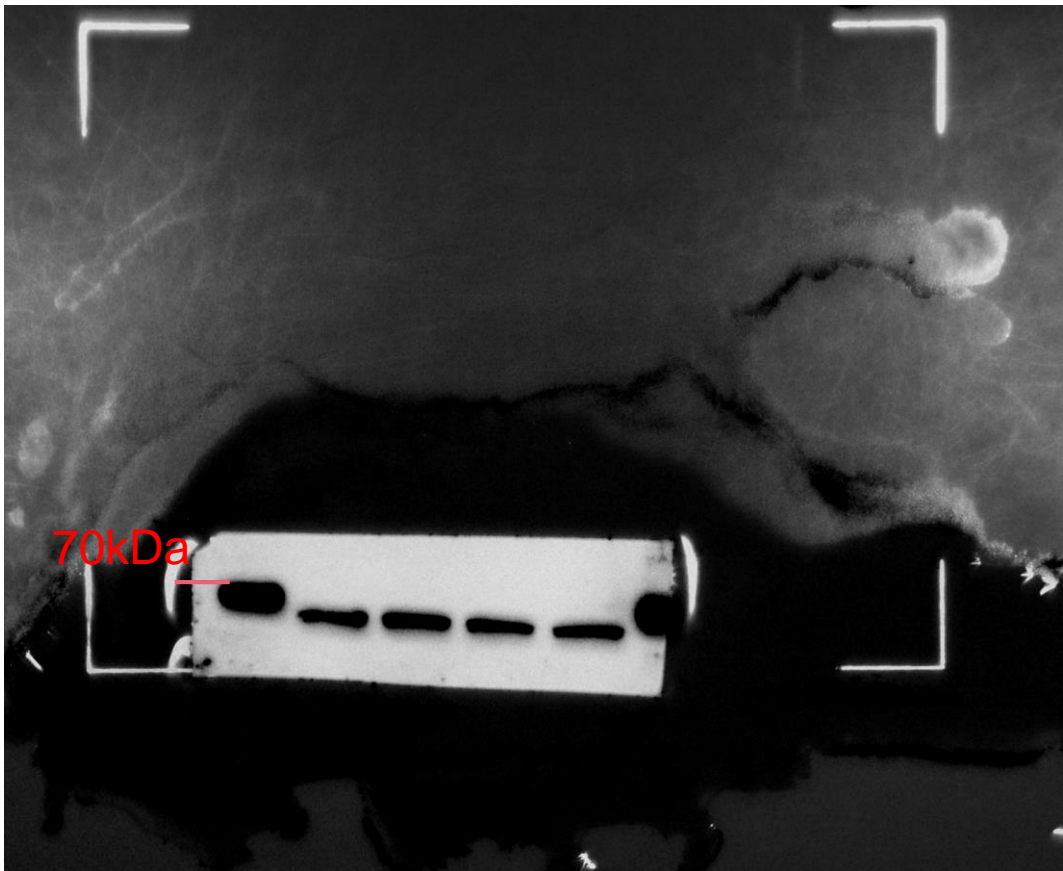

$\beta$ -Tubulin

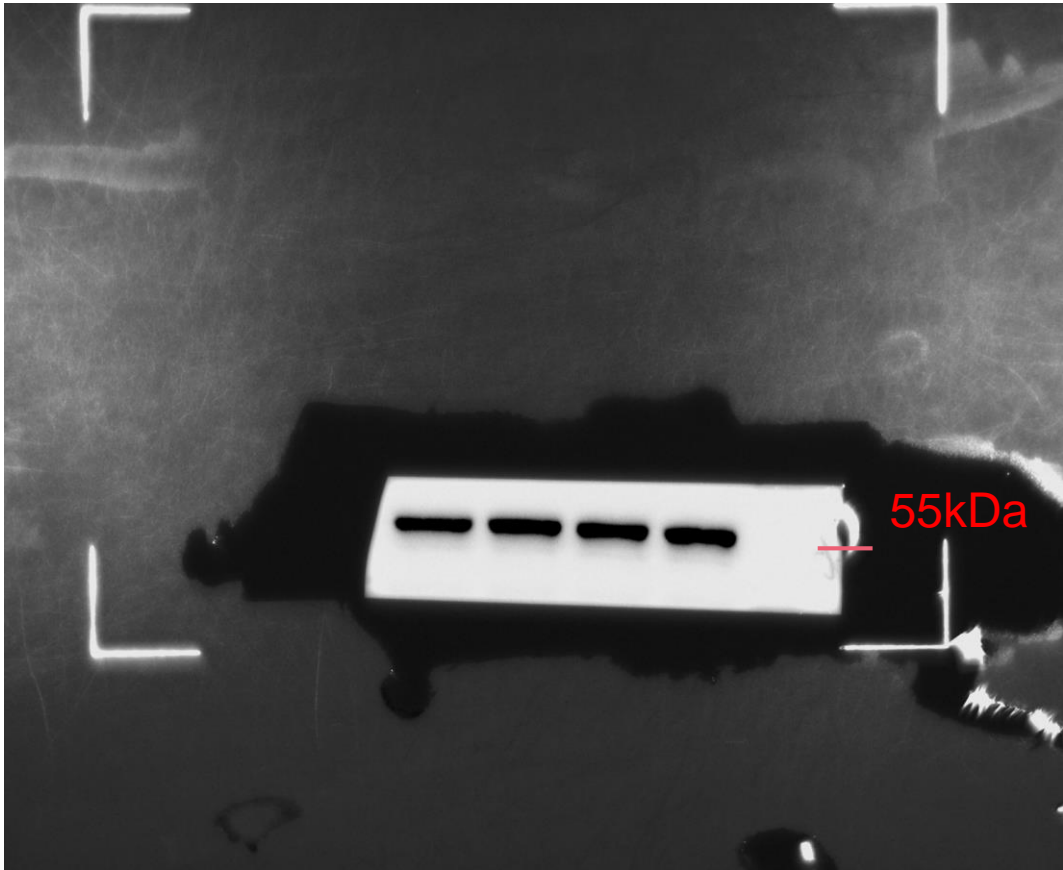

Figure 4C H226

|             |   |   |   |   |
|-------------|---|---|---|---|
| Palbociclib | - | + | - | + |
| Stattic     | - | - | + | + |

55kDa

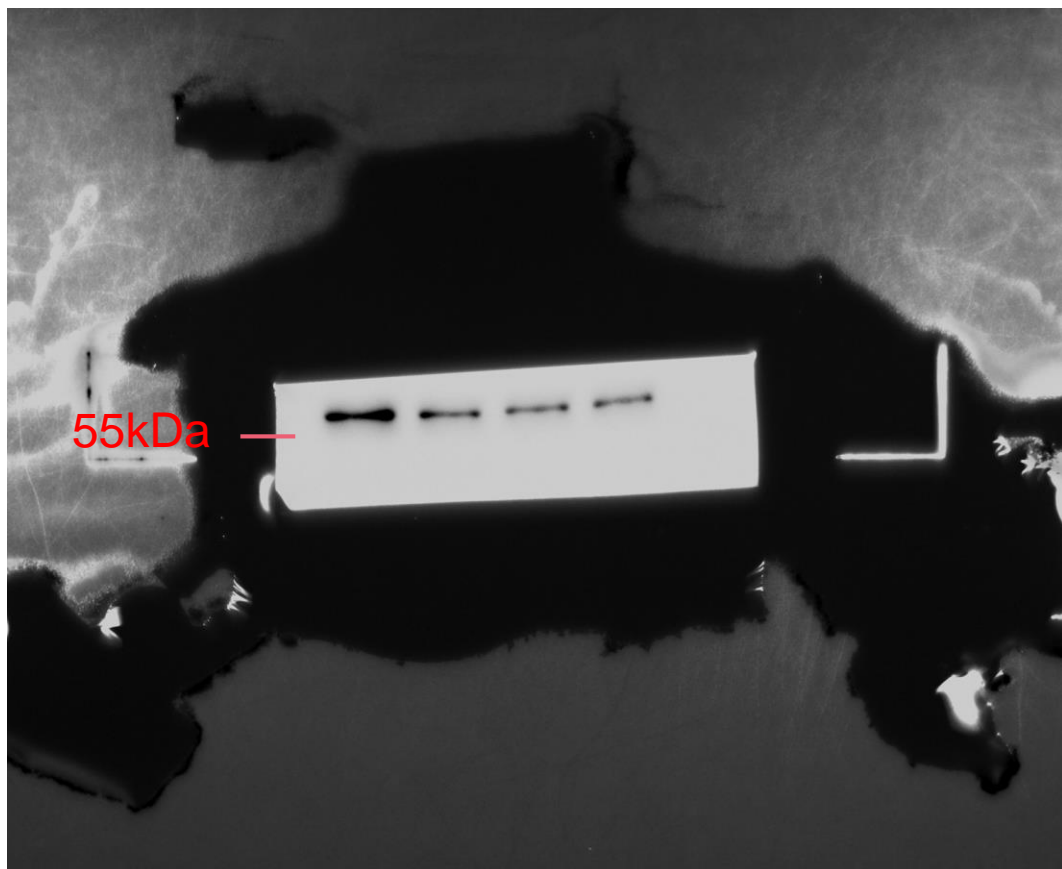

70kDa

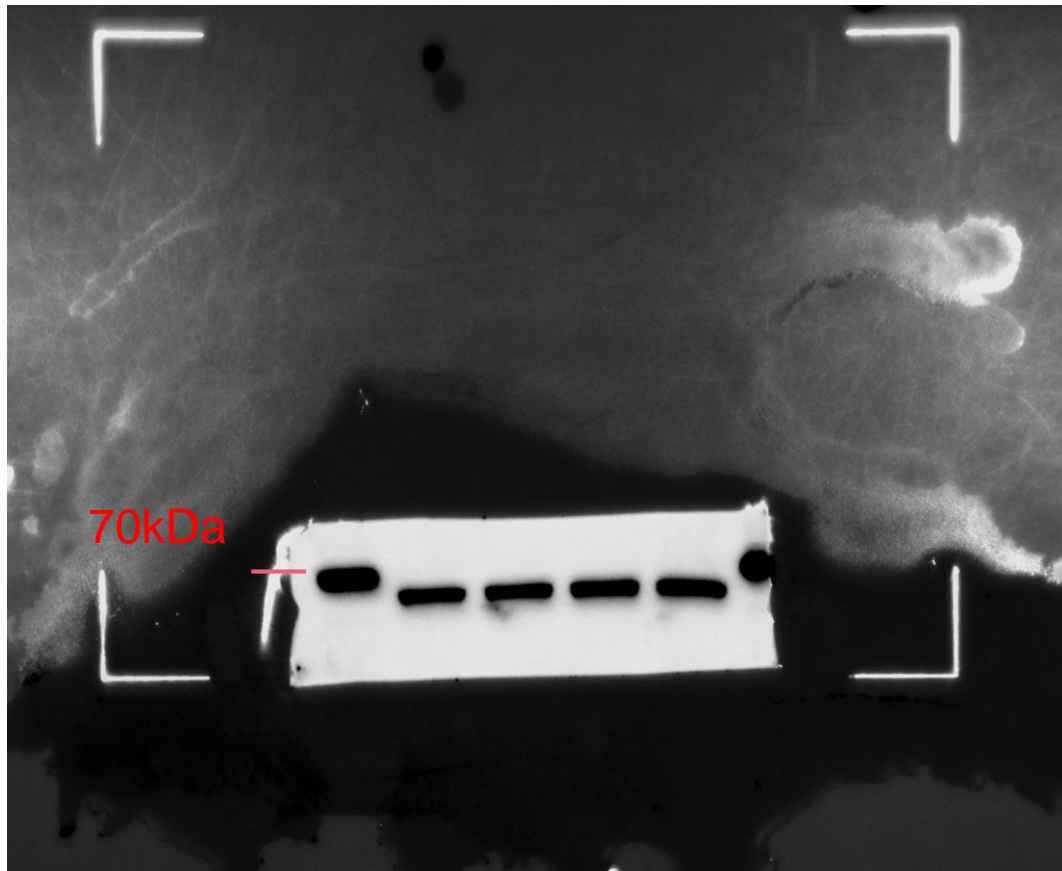

55kDa

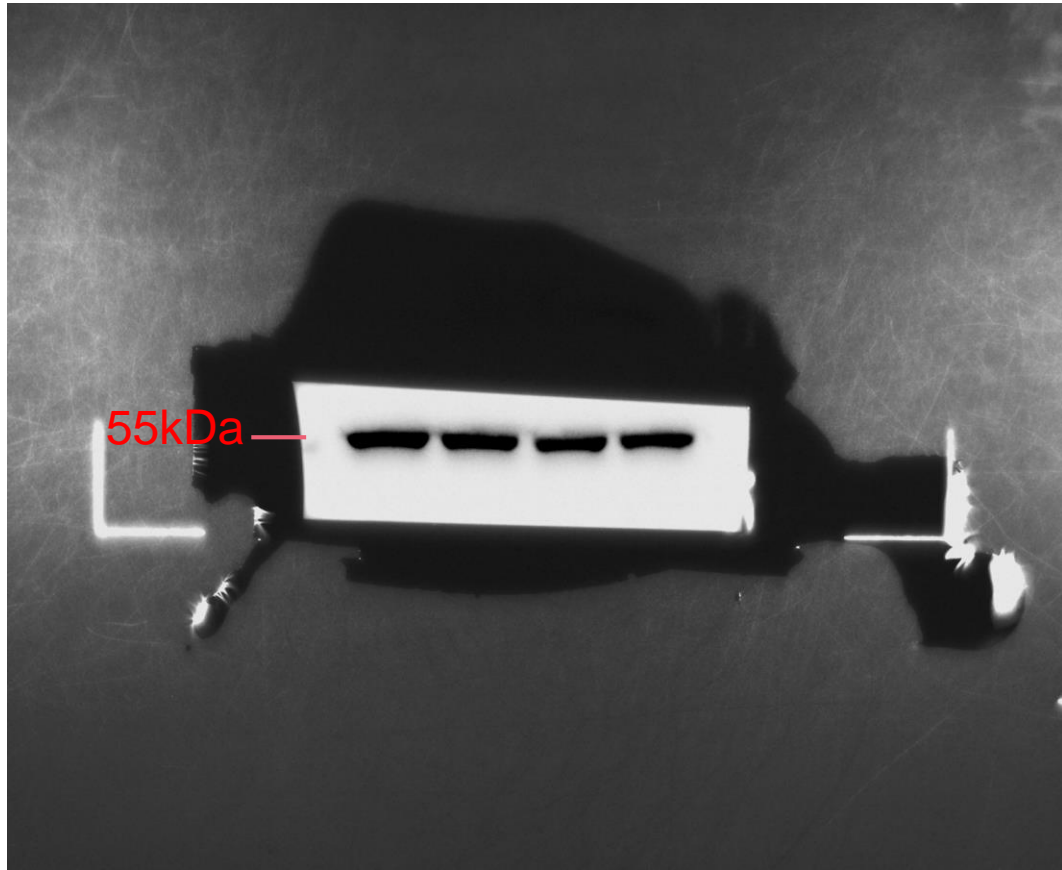

Figure S8. The original image Western blotting of Figure 4C.



Figure 5C H520

Con Pal Pal+IgG Pal+IL-1 $\beta$  Pal+IL-6

p-STAT3

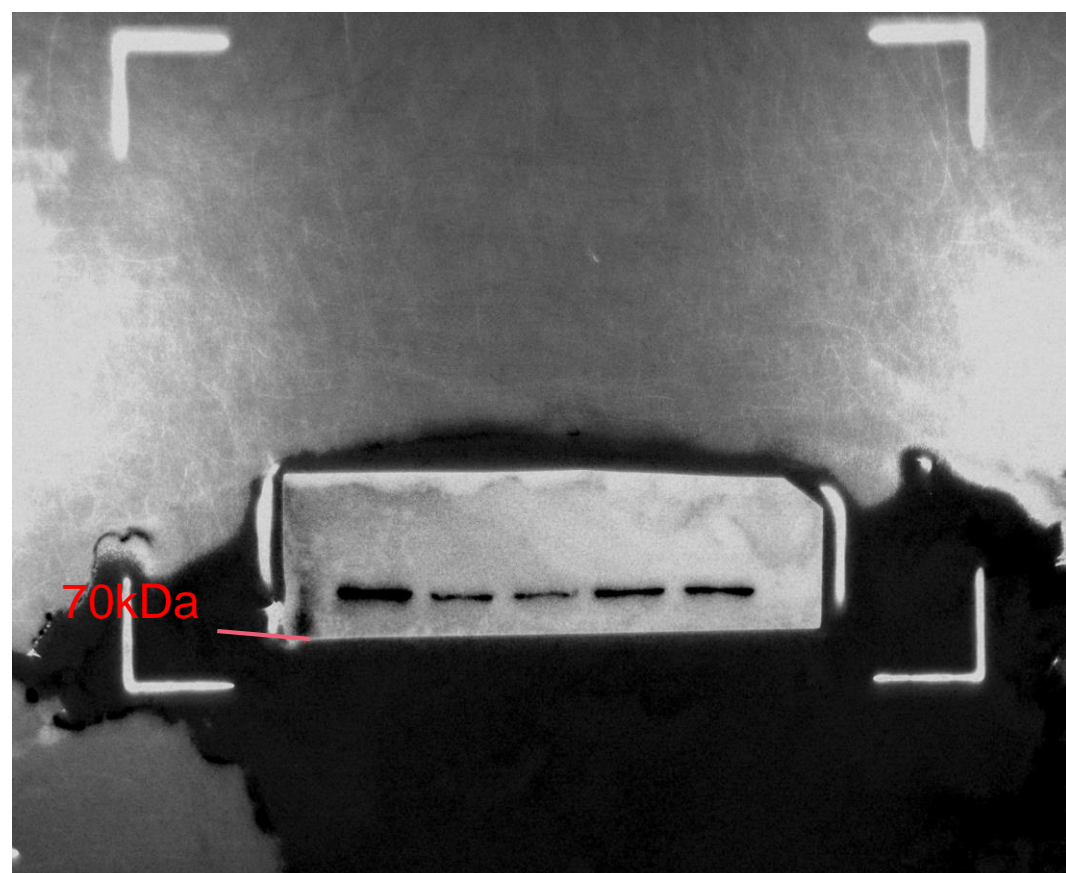

STAT3

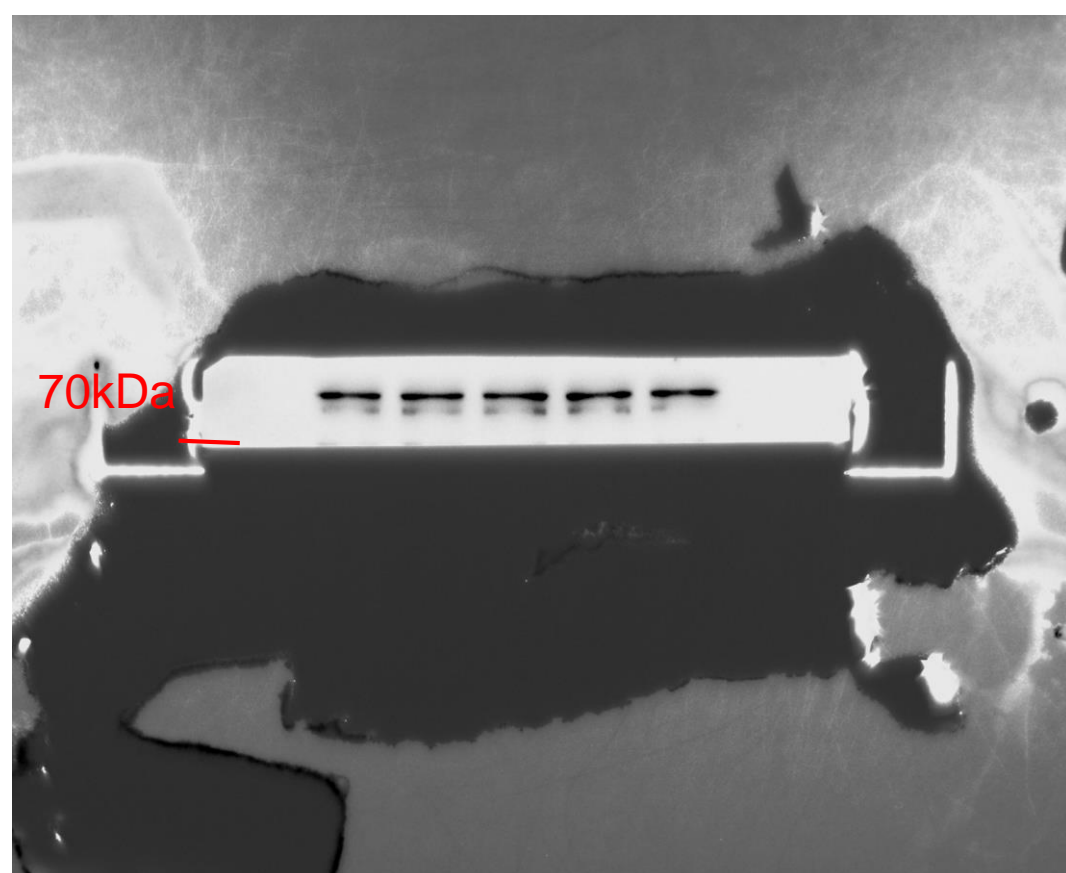

p-Src

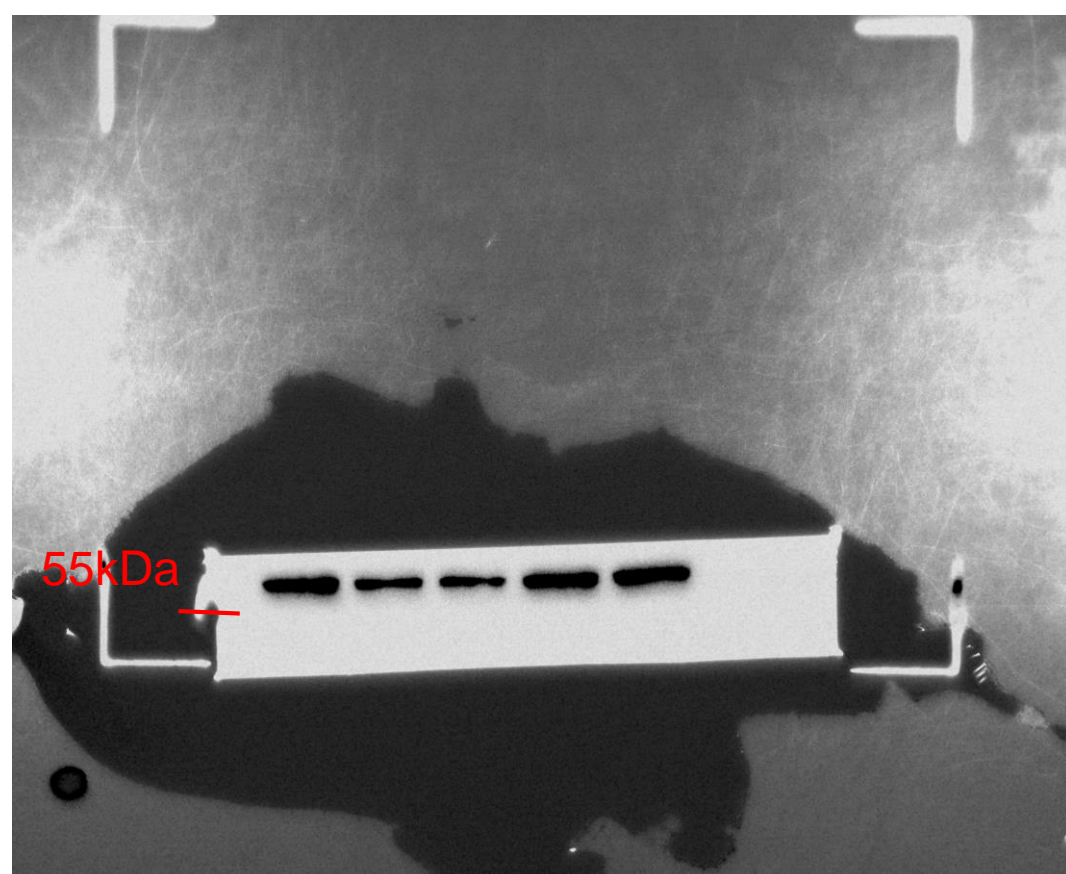

Src

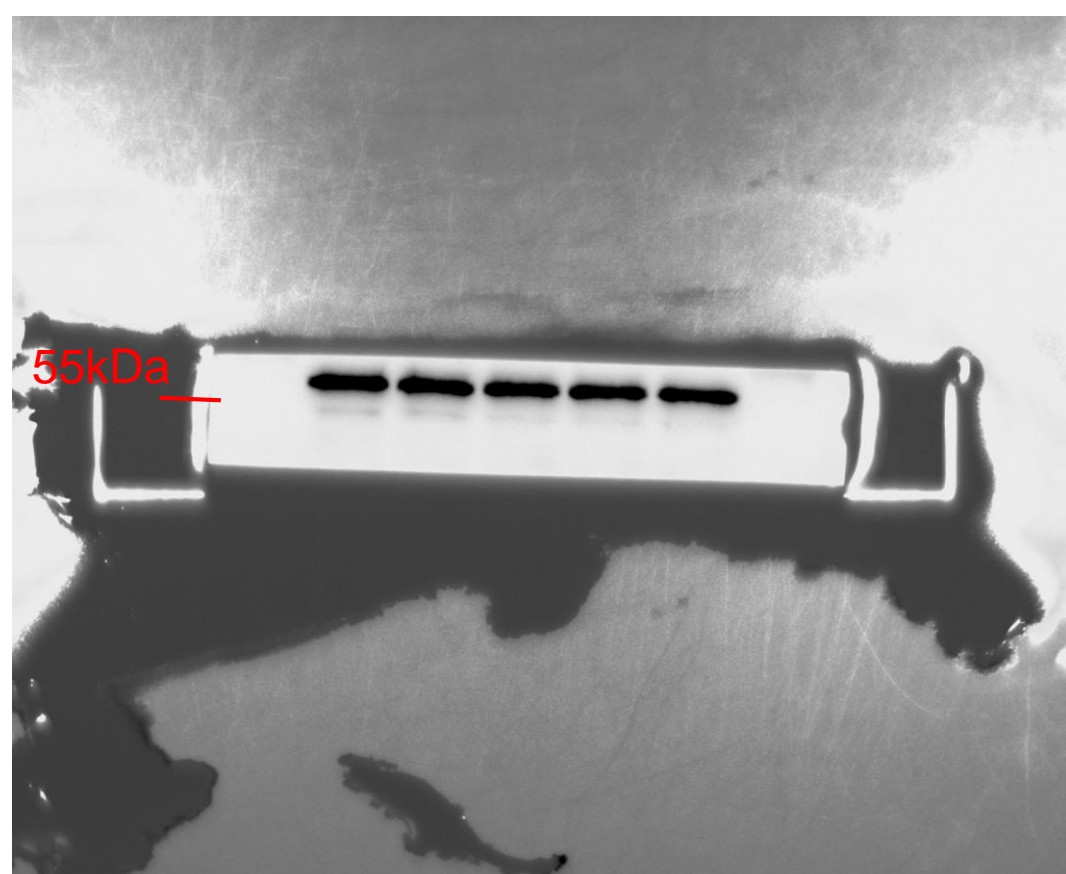

Figure 5C H226

Con Pal Pal+IgG Pal+IL-1 $\beta$  Pal+IL-6

70kDa

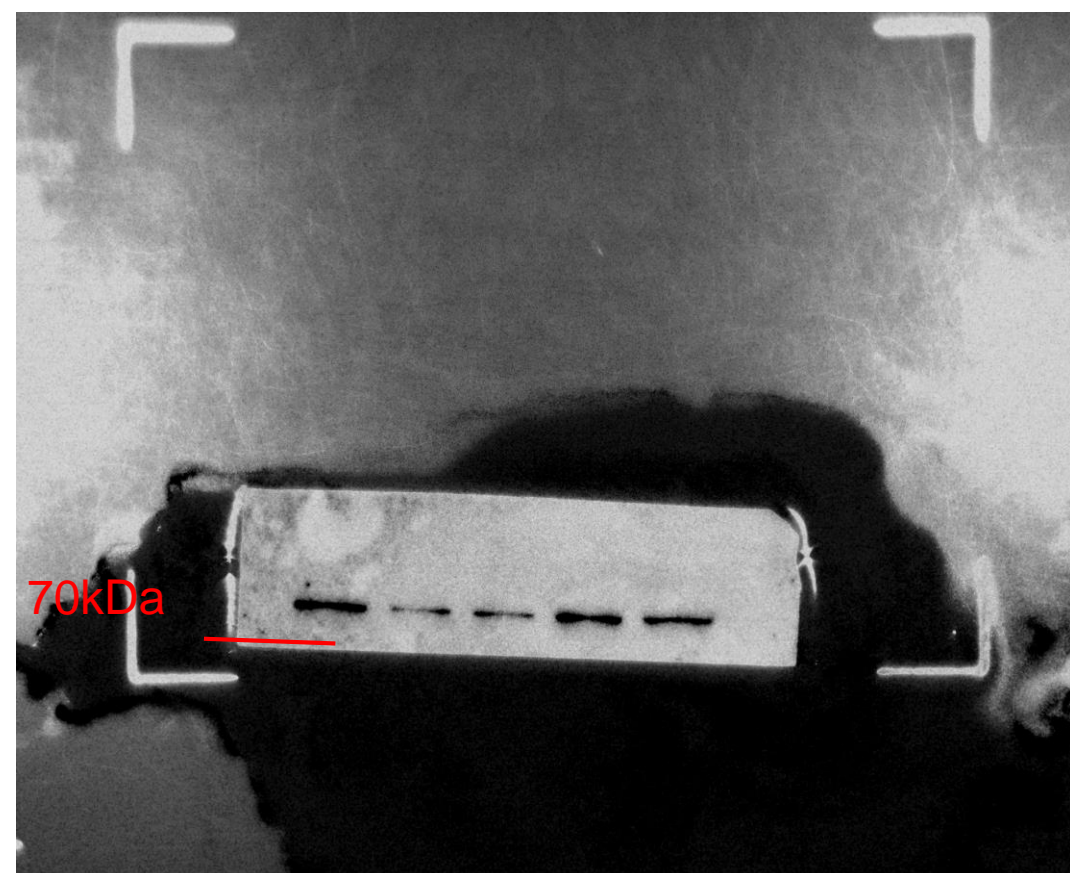

70kDa

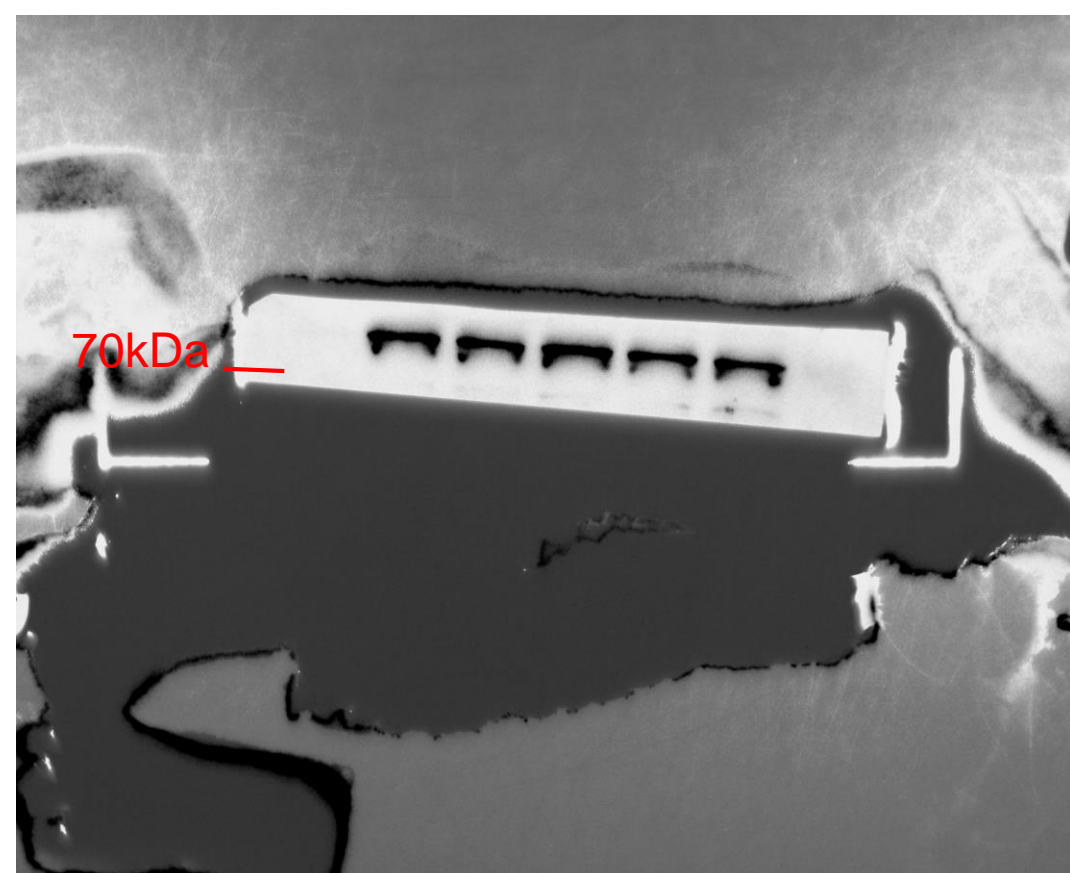

55kDa

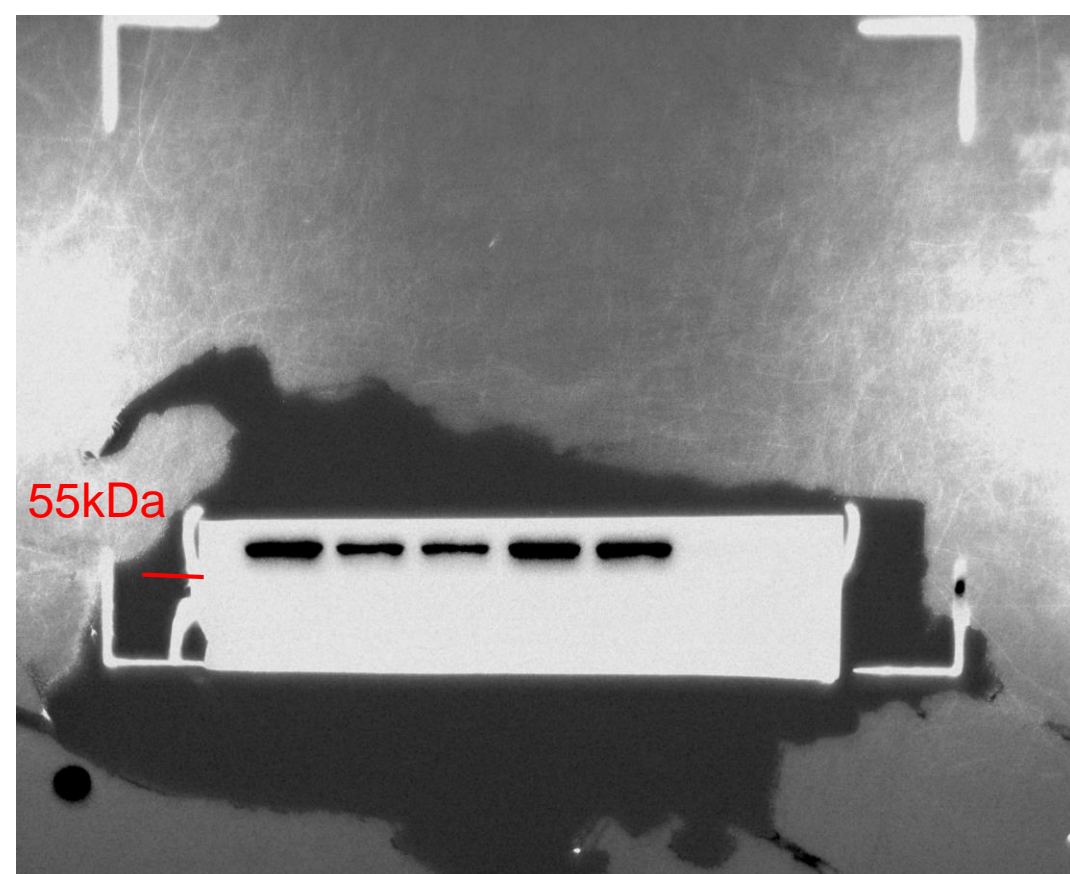

55kDa

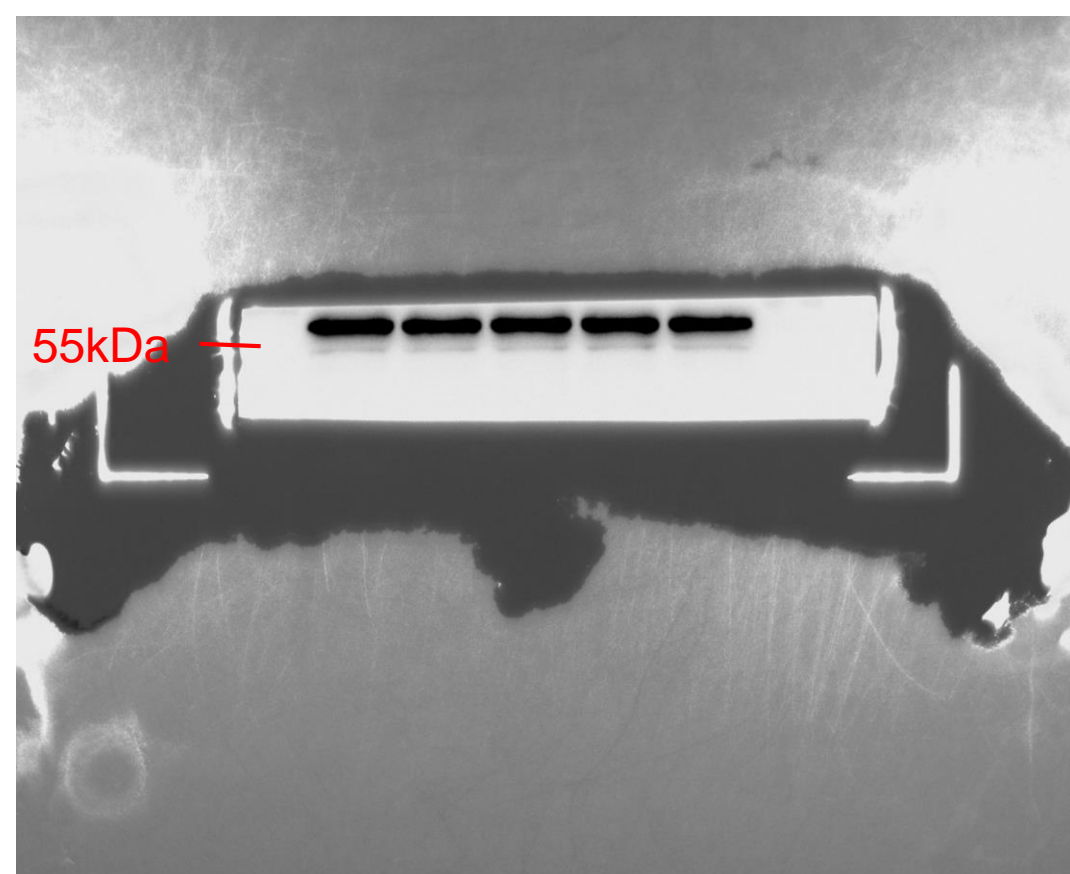



**Figure S9.** The original image Western blotting of Figure 5C.

Figure 6A    H520

Figure 6A    H226

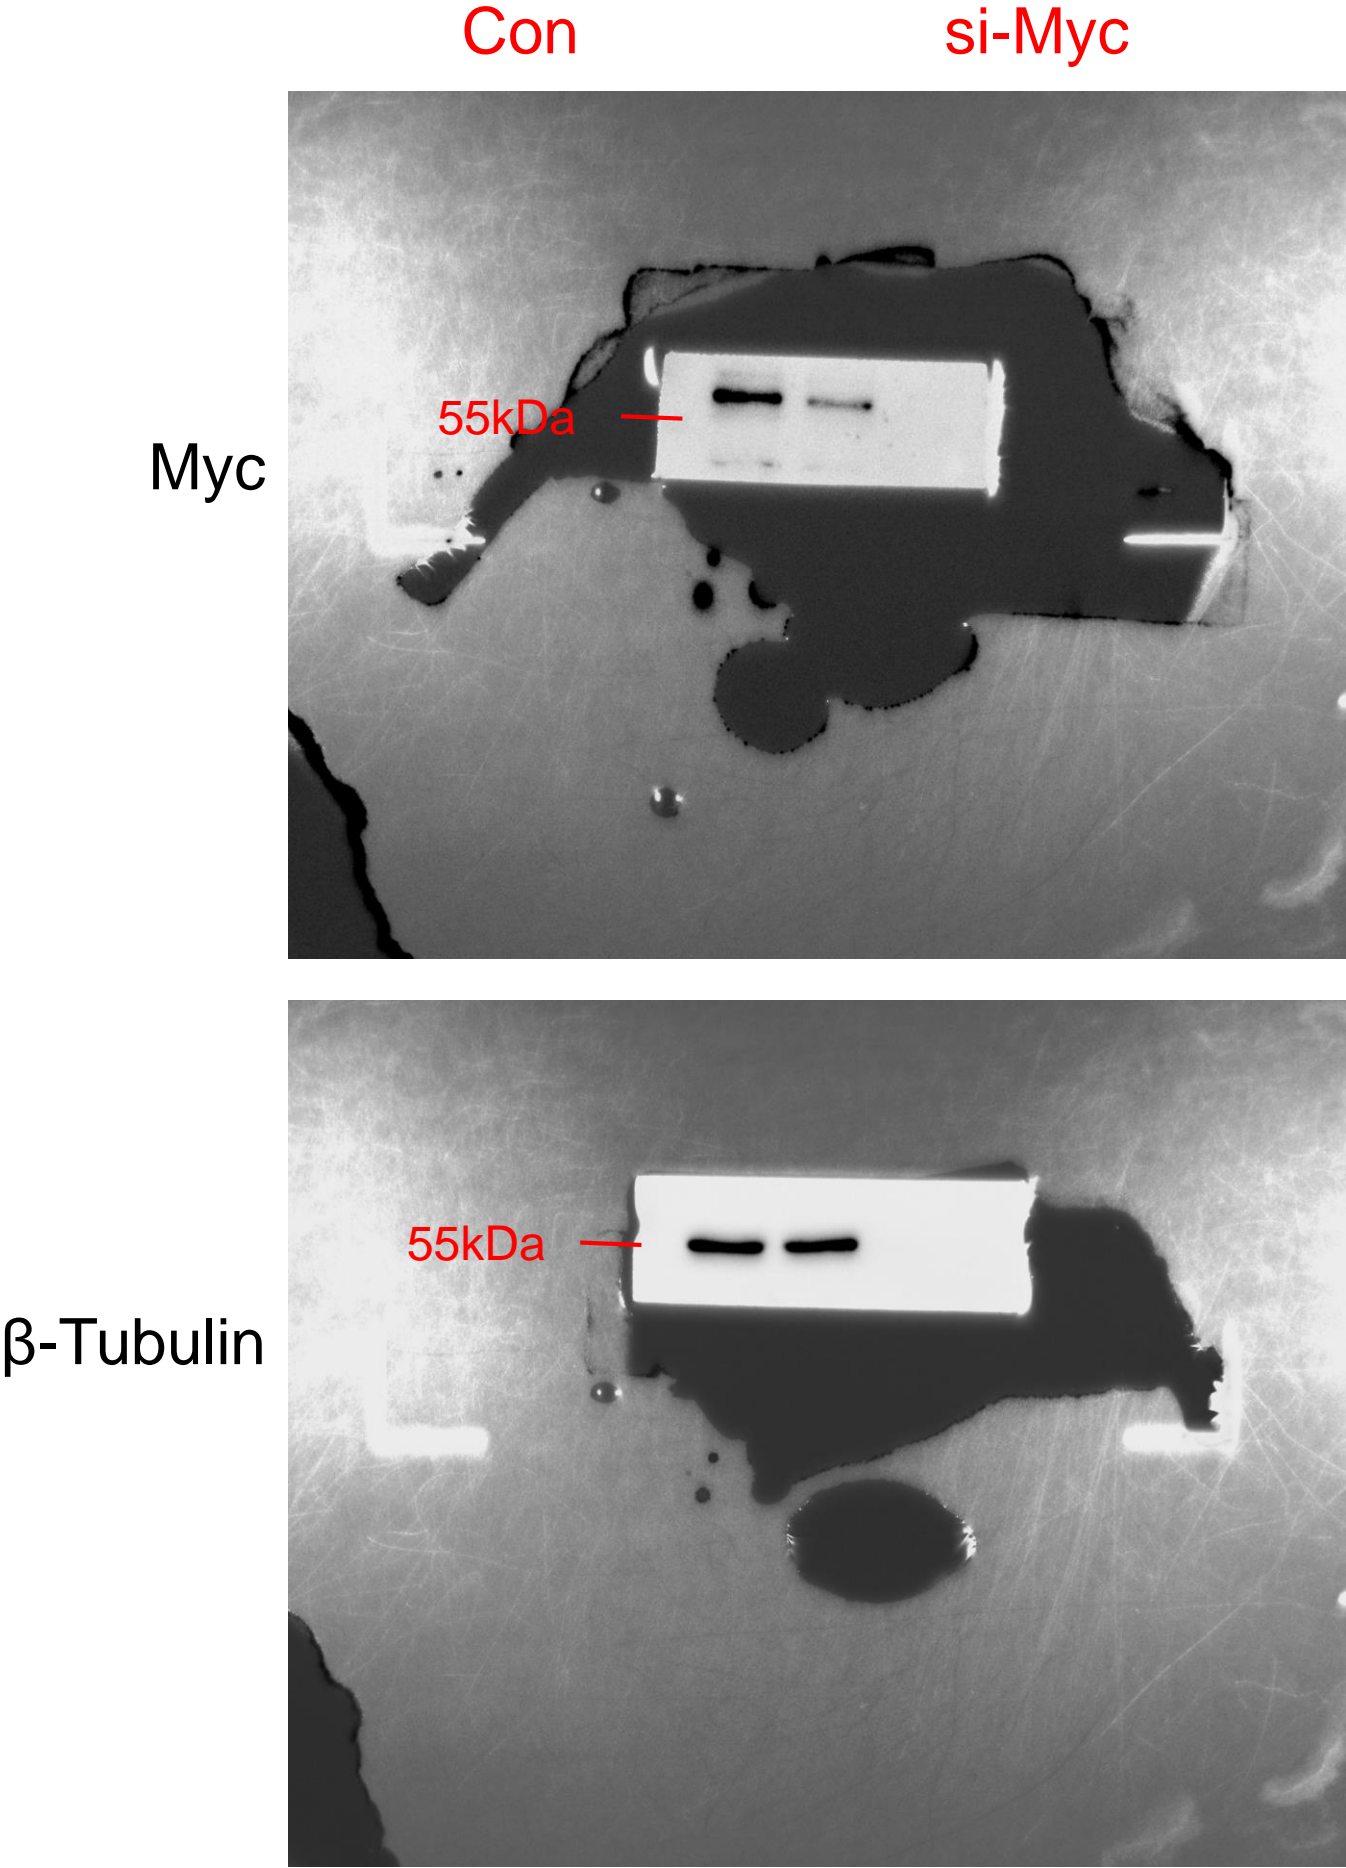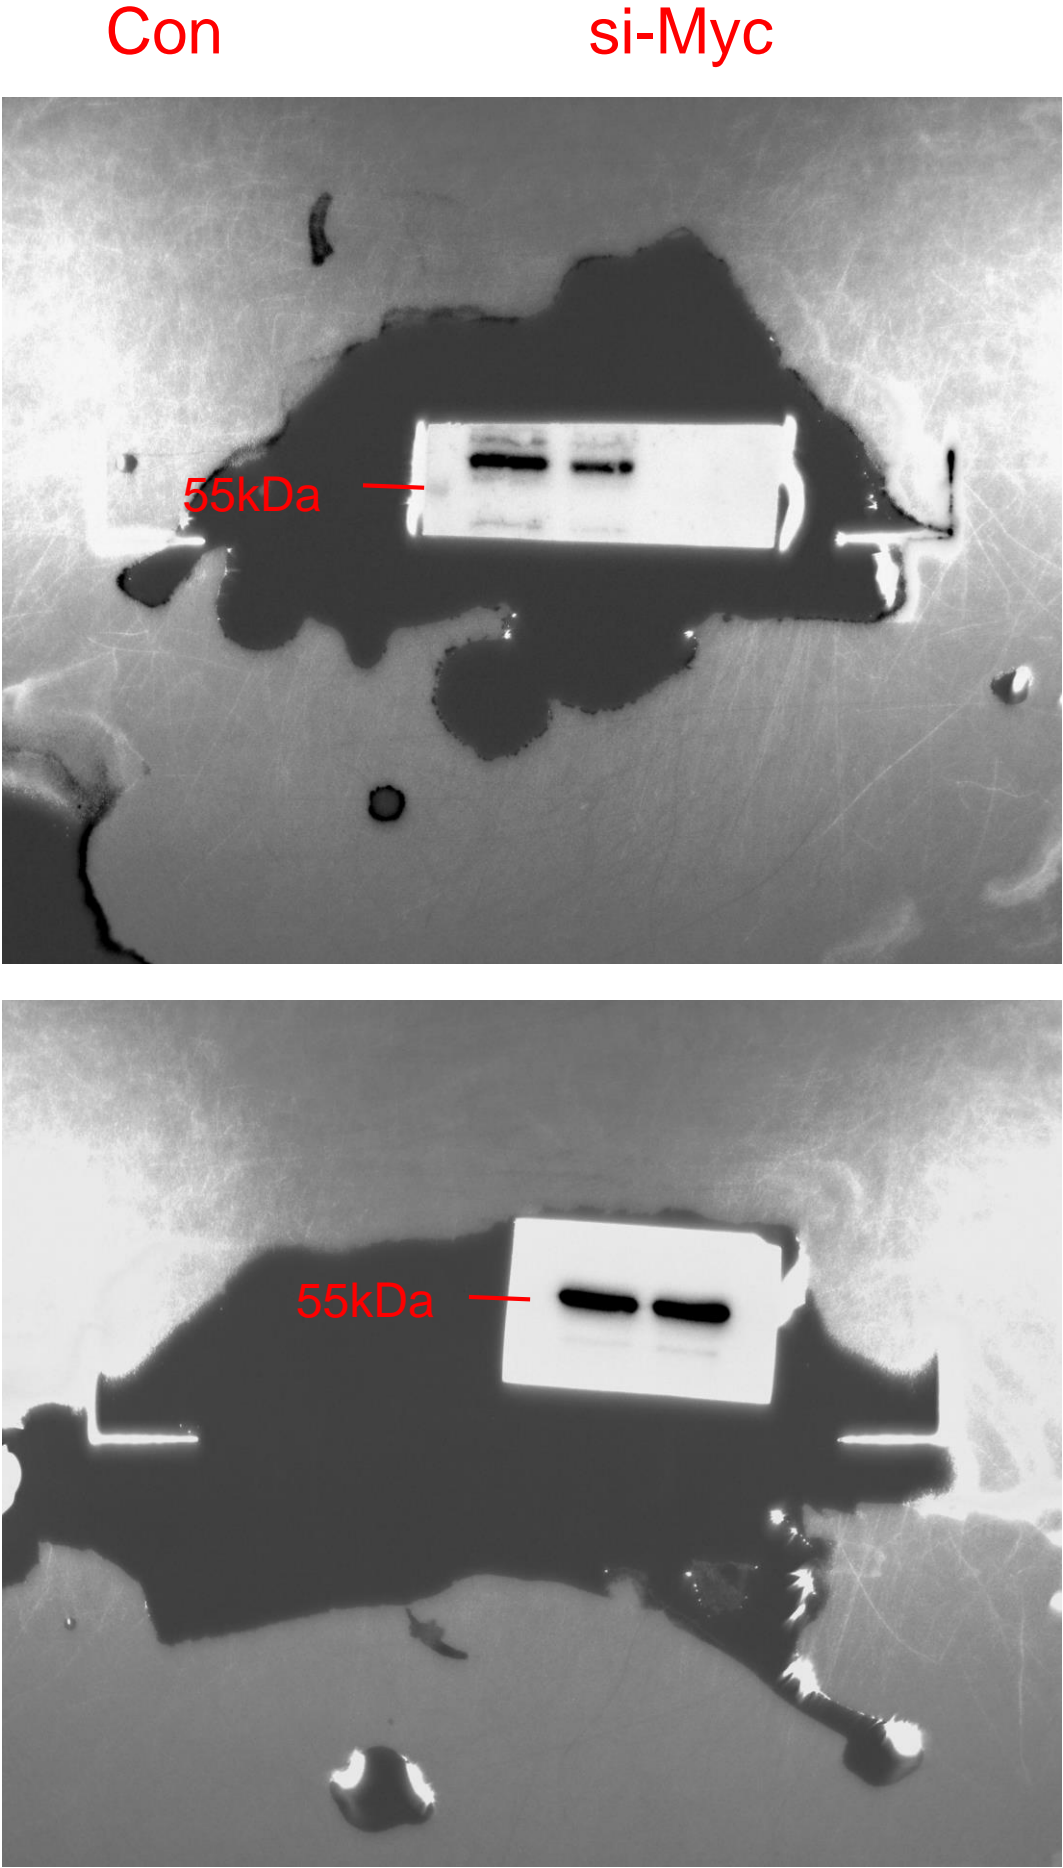

**Figure S10.** The original image Western blotting of Figure 6A.



Figure 6C H520

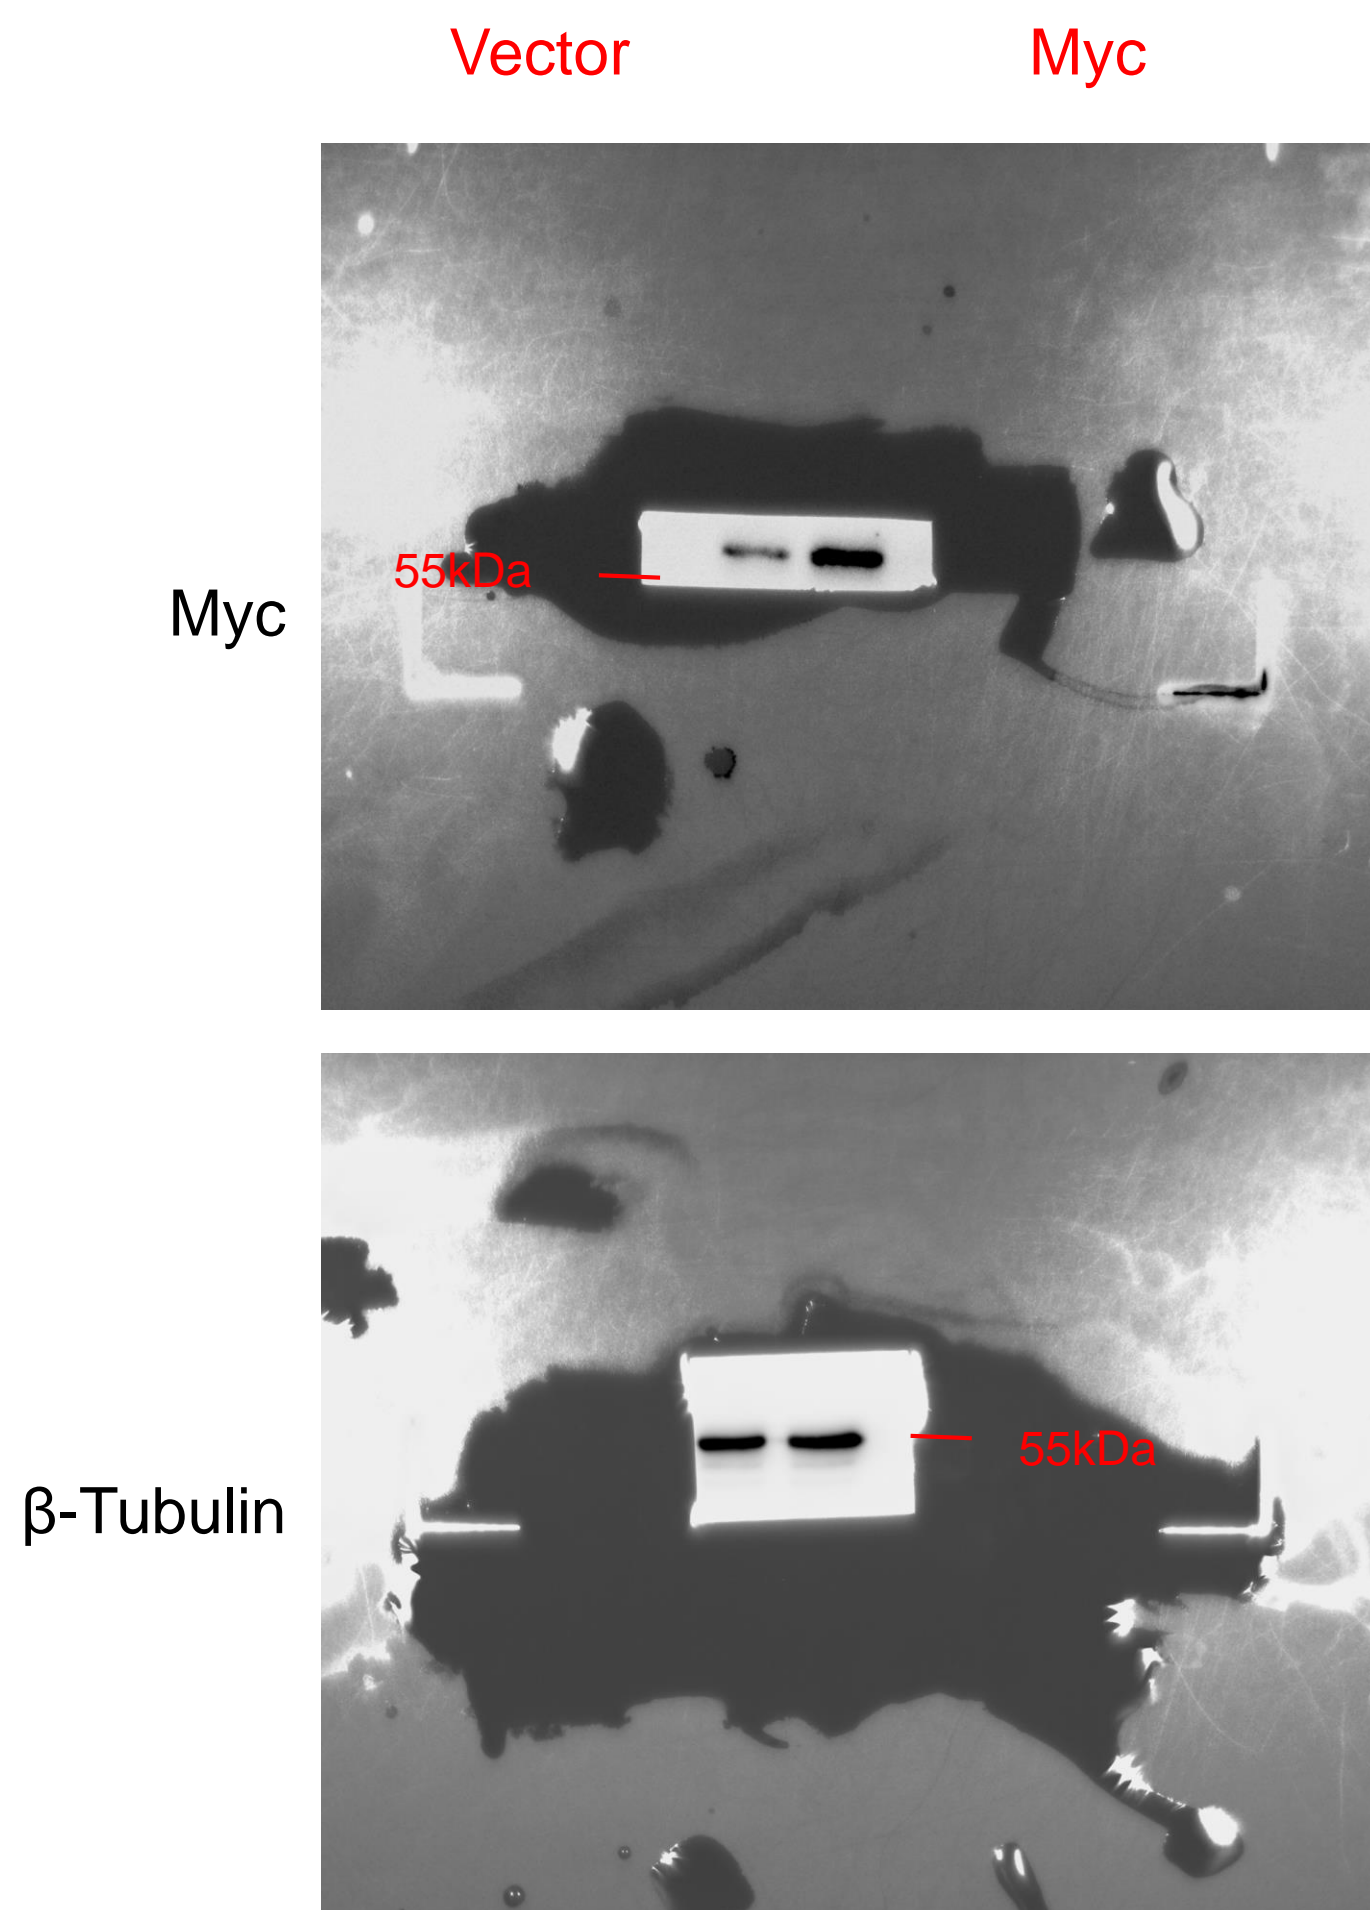

Figure 6C H226

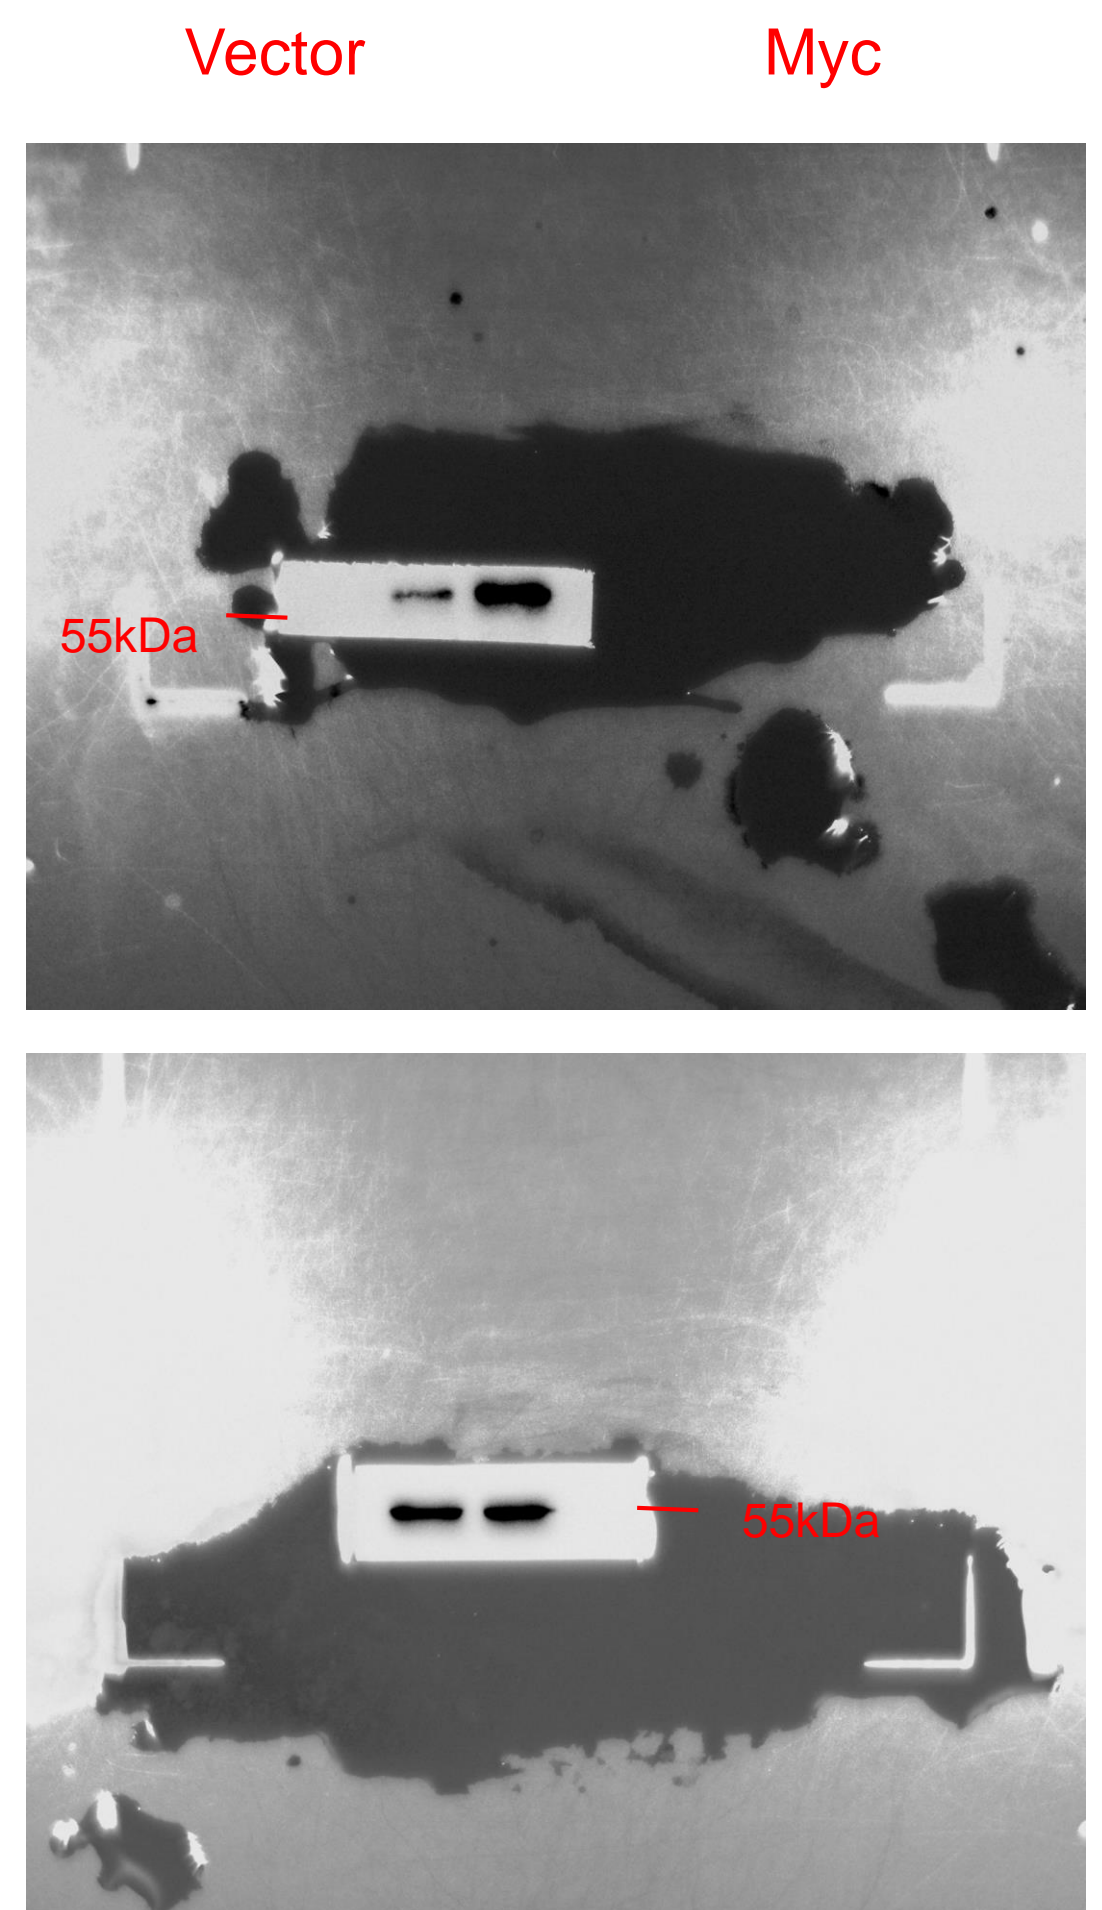

**Figure S11.** The original image Western blotting of Figure 6C.
